# Supplementary material for: ZMT04 muscovite: a potential Paleoproterozoic reference material for 40Ar/39Ar dating
Source: Royal Society of Chemistry journal article supplement (doi:10.1039/d4ja00172a), 2024-01-01
Supplement: d4ja00172a1.pdf [file d4ja00172a1.pdf]

**Table S1. Major element composition of the ZMT04 muscovite by EPMA (wt.%)**

| Point                  | F     | Cl             | MgO    | TiO <sub>2</sub> | MnO    | P <sub>2</sub> O <sub>5</sub> | K <sub>2</sub> O | FeO    | Na <sub>2</sub> O | Al <sub>2</sub> O <sub>3</sub> | SiO <sub>2</sub> | CaO    | Total  | K <sub>2</sub> O average | 2sd  | 2rsd (%) | K <sub>2</sub> O Total average | 2sd of Total data | 2rsd of Total data (%) |
|------------------------|-------|----------------|--------|------------------|--------|-------------------------------|------------------|--------|-------------------|--------------------------------|------------------|--------|--------|--------------------------|------|----------|--------------------------------|-------------------|------------------------|
| D.L. (3σ) <sup>1</sup> | ##### | #####          | 0.0273 | 0.0255           | 0.0333 | 0.0276                        | 0.0312           | 0.0645 | 0.0264            | 0.0273                         | 0.0405           | 0.0093 |        |                          |      |          |                                |                   |                        |
| grain1-1               | 2.303 | \ <sup>2</sup> | 0.756  | 0.422            | \      | \                             | 10.262           | 3.547  | 0.818             | 30.989                         | 45.669           | \      | 94.766 | 10.35                    | 0.20 | 1.93     | 10.38                          | 0.22              | 2.12                   |
| grain1-2               | 2.228 | \              | 0.723  | 0.423            | 0.055  | 0.033                         | 10.322           | 3.719  | 0.836             | 31.155                         | 45.960           | \      | 95.454 |                          |      |          |                                |                   |                        |
| grain1-3               | 2.254 | \              | 0.744  | 0.420            | \      | \                             | 10.212           | 3.816  | 0.866             | 31.276                         | 46.109           | \      | 95.697 |                          |      |          |                                |                   |                        |
| grain1-4               | 2.184 | \              | 0.744  | 0.450            | \      | \                             | 10.374           | 3.716  | 0.849             | 30.994                         | 45.980           | \      | 95.291 |                          |      |          |                                |                   |                        |
| grain1-5               | 2.200 | \              | 0.751  | 0.417            | \      | \                             | 10.352           | 3.896  | 0.825             | 31.009                         | 45.906           | \      | 95.356 |                          |      |          |                                |                   |                        |
| grain1-6               | 2.203 | \              | 0.723  | 0.436            | \      | \                             | 10.305           | 3.878  | 0.878             | 31.415                         | 46.760           | \      | 96.598 |                          |      |          |                                |                   |                        |
| grain1-7               | 2.266 | \              | 0.752  | 0.433            | 0.034  | 0.043                         | 10.479           | 3.986  | 0.869             | 31.047                         | 45.585           | \      | 95.494 |                          |      |          |                                |                   |                        |
| grain1-8               | 2.221 | \              | 0.766  | 0.428            | 0.046  | \                             | 10.293           | 3.847  | 0.844             | 31.160                         | 46.189           | \      | 95.794 |                          |      |          |                                |                   |                        |
| grain1-9               | 2.222 | \              | 0.737  | 0.399            | 0.044  | \                             | 10.264           | 3.704  | 0.764             | 30.531                         | 45.124           | \      | 93.789 |                          |      |          |                                |                   |                        |
| grain1-10              | 2.144 | \              | 0.708  | 0.416            | 0.034  | 0.028                         | 10.221           | 3.858  | 0.859             | 31.368                         | 46.245           | \      | 95.881 |                          |      |          |                                |                   |                        |
| grain1-11              | 2.182 | \              | 0.739  | 0.433            | \      | \                             | 10.195           | 3.750  | 0.881             | 31.507                         | 46.302           | \      | 95.989 |                          |      |          |                                |                   |                        |
| grain1-12              | 2.077 | \              | 0.754  | 0.431            | \      | \                             | 10.408           | 3.800  | 0.865             | 31.358                         | 46.435           | \      | 96.128 |                          |      |          |                                |                   |                        |
| grain1-13              | 2.204 | \              | 0.746  | 0.430            | 0.043  | \                             | 10.238           | 3.832  | 0.804             | 31.381                         | 46.468           | \      | 96.146 |                          |      |          |                                |                   |                        |
| grain1-14              | 2.231 | \              | 0.694  | 0.426            | \      | \                             | 10.481           | 3.667  | 0.800             | 31.341                         | 46.610           | \      | 96.250 |                          |      |          |                                |                   |                        |
| grain1-15              | 2.157 | \              | 0.729  | 0.453            | 0.036  | 0.029                         | 10.126           | 3.810  | 0.874             | 31.464                         | 46.421           | \      | 96.099 |                          |      |          |                                |                   |                        |
| grain1-16              | 2.176 | \              | 0.764  | 0.436            | \      | \                             | 10.427           | 3.833  | 0.844             | 31.616                         | 46.283           | \      | 96.379 |                          |      |          |                                |                   |                        |
| grain1-17              | 2.137 | \              | 0.755  | 0.456            | \      | \                             | 10.482           | 3.845  | 0.861             | 31.627                         | 46.450           | \      | 96.613 |                          |      |          |                                |                   |                        |
| grain1-18              | 2.208 | \              | 0.715  | 0.430            | 0.037  | \                             | 10.178           | 3.686  | 0.839             | 31.537                         | 46.553           | \      | 96.183 |                          |      |          |                                |                   |                        |
| grain1-19              | 2.191 | \              | 0.720  | 0.365            | \      | \                             | 10.426           | 3.728  | 0.802             | 31.597                         | 46.336           | \      | 96.165 |                          |      |          |                                |                   |                        |
| grain1-20              | 2.216 | \              | 0.696  | 0.421            | 0.041  | 0.032                         | 10.367           | 3.718  | 0.894             | 31.612                         | 46.347           | \      | 96.344 |                          |      |          |                                |                   |                        |
| grain1-21              | 2.167 | \              | 0.759  | 0.418            | \      | \                             | 10.419           | 3.614  | 0.838             | 31.491                         | 46.441           | \      | 96.147 |                          |      |          |                                |                   |                        |
| grain1-22              | 2.144 | \              | 0.722  | 0.409            | \      | \                             | 10.386           | 3.548  | 0.807             | 31.399                         | 46.461           | \      | 95.876 |                          |      |          |                                |                   |                        |
| grain1-23              | 2.174 | \              | 0.728  | 0.438            | 0.033  | \                             | 10.403           | 3.866  | 0.889             | 31.404                         | 46.531           | \      | 96.466 |                          |      |          |                                |                   |                        |
| grain1-24              | 2.190 | \              | 0.751  | 0.423            | 0.039  | \                             | 10.358           | 3.491  | 0.813             | 31.442                         | 46.388           | \      | 95.895 |                          |      |          |                                |                   |                        |
| grain1-25              | 2.134 | \              | 0.743  | 0.378            | 0.045  | \                             | 10.336           | 3.789  | 0.830             | 31.356                         | 46.361           | \      | 95.972 |                          |      |          |                                |                   |                        |
| grain1-26              | 2.204 | \              | 0.788  | 0.438            | 0.046  | \                             | 10.156           | 3.745  | 0.821             | 31.412                         | 46.418           | \      | 96.028 |                          |      |          |                                |                   |                        |
| grain1-27              | 2.120 | \              | 0.778  | 0.449            | 0.045  | \                             | 10.324           | 3.781  | 0.838             | 31.491                         | 46.355           | \      | 96.181 |                          |      |          |                                |                   |                        |
| grain1-28              | 2.224 | \              | 0.688  | 0.412            | 0.036  | \                             | 10.210           | 3.740  | 0.849             | 31.426                         | 46.506           | \      | 96.091 |                          |      |          |                                |                   |                        |
| grain1-29              | 2.260 | \              | 0.716  | 0.385            | \      | \                             | 10.475           | 3.641  | 0.873             | 31.274                         | 46.558           | \      | 96.182 |                          |      |          |                                |                   |                        |
| grain1-30              | 2.209 | \              | 0.743  | 0.434            | 0.048  | \                             | 10.510           | 3.707  | 0.859             | 31.556                         | 46.197           | \      | 96.263 |                          |      |          |                                |                   |                        |
| grain1-31              | 2.169 | \              | 0.723  | 0.413            | \      | 0.032                         | 10.474           | 3.879  | 0.823             | 31.719                         | 46.413           | \      | 96.645 |                          |      |          |                                |                   |                        |
| grain1-32              | 2.205 | \              | 0.785  | 0.427            | \      | \                             | 10.407           | 3.903  | 0.823             | 31.449                         | 46.303           | \      | 96.302 |                          |      |          |                                |                   |                        |
| grain1-33              | 2.158 | \              | 0.747  | 0.426            | \      | \                             | 10.385           | 3.684  | 0.823             | 31.397                         | 46.496           | \      | 96.116 |                          |      |          |                                |                   |                        |
| grain1-34              | 2.149 | \              | 0.729  | 0.432            | 0.037  | \                             | 10.461           | 3.847  | 0.864             | 31.546                         | 46.300           | \      | 96.365 |                          |      |          |                                |                   |                        |
| grain1-35              | 2.208 | \              | 0.757  | 0.445            | 0.040  | 0.030                         | 10.405           | 3.558  | 0.910             | 31.644                         | 46.335           | \      | 96.332 |                          |      |          |                                |                   |                        |
| grain1-36              | 2.188 | \              | 0.763  | 0.431            | \      | \                             | 10.482           | 3.728  | 0.905             | 31.589                         | 46.447           | \      | 96.533 |                          |      |          |                                |                   |                        |
| grain1-37              | 2.182 | \              | 0.719  | 0.446            | \      | 0.030                         | 10.289           | 3.599  | 0.833             | 31.570                         | 46.625           | \      | 96.293 |                          |      |          |                                |                   |                        |
| grain1-38              | 2.211 | \              | 0.714  | 0.403            | \      | \                             | 10.313           | 3.692  | 0.849             | 31.609                         | 46.549           | \      | 96.340 |                          |      |          |                                |                   |                        |
| grain1-39              | 2.219 | \              | 0.724  | 0.395            | 0.043  | \                             | 10.339           | 3.791  | 0.876             | 31.764                         | 46.895           | \      | 97.046 |                          |      |          |                                |                   |                        |
| grain1-40              | 2.215 | \              | 0.788  | 0.409            | \      | \                             | 10.288           | 3.597  | 0.842             | 31.702                         | 46.819           | \      | 96.660 |                          |      |          |                                |                   |                        |
| grain2-1               | 2.257 | \              | 0.742  | 0.411            | \      | 0.029                         | 10.402           | 3.874  | 0.816             | 31.268                         | 45.926           | \      | 95.725 | 10.40                    | 0.22 | 2.12     |                                |                   |                        |
| grain2-2               | 2.299 | \              | 0.763  | 0.433            | \      | \                             | 10.523           | 3.973  | 0.799             | 31.141                         | 46.095           | \      | 96.026 |                          |      |          |                                |                   |                        |
| grain2-3               | 2.226 | \              | 0.752  | 0.438            | \      | \                             | 10.346           | 3.846  | 0.828             | 31.214                         | 46.141           | \      | 95.791 |                          |      |          |                                |                   |                        |
| grain2-4               | 2.351 | \              | 0.780  | 0.422            | 0.046  | \                             | 10.362           | 3.970  | 0.842             | 31.206                         | 46.235           | \      | 96.214 |                          |      |          |                                |                   |                        |

|             |       |   |       |       |       |       |        |       |       |        |        |   |        |       |      |      |
|-------------|-------|---|-------|-------|-------|-------|--------|-------|-------|--------|--------|---|--------|-------|------|------|
| grain2-5    | 2.341 | \ | 0.702 | 0.423 | \     | \     | 10.337 | 3.832 | 0.875 | 31.341 | 46.265 | \ | 96.116 |       |      |      |
| grain2-6    | 2.298 | \ | 0.784 | 0.427 | \     | \     | 10.264 | 3.827 | 0.838 | 31.251 | 46.176 | \ | 95.865 |       |      |      |
| grain2-7    | 2.238 | \ | 0.744 | 0.431 | \     | \     | 10.346 | 3.846 | 0.830 | 31.274 | 46.043 | \ | 95.752 |       |      |      |
| grain2-8    | 2.443 | \ | 0.757 | 0.433 | 0.042 | \     | 10.496 | 3.673 | 0.829 | 31.606 | 46.226 | \ | 96.505 |       |      |      |
| grain2-9    | 2.232 | \ | 0.766 | 0.418 | \     | 0.041 | 10.407 | 3.859 | 0.860 | 31.552 | 46.383 | \ | 96.518 |       |      |      |
| grain2-10   | 2.234 | \ | 0.684 | 0.443 | \     | \     | 10.245 | 3.876 | 0.867 | 31.545 | 46.115 | \ | 96.009 |       |      |      |
| grain2-11   | 2.322 | \ | 0.750 | 0.445 | \     | \     | 10.474 | 3.876 | 0.879 | 31.442 | 46.327 | \ | 96.515 |       |      |      |
| grain2-12   | 2.329 | \ | 0.720 | 0.440 | \     | \     | 10.484 | 3.874 | 0.779 | 31.649 | 46.136 | \ | 96.411 |       |      |      |
| grain2-13   | 2.229 | \ | 0.768 | 0.443 | \     | \     | 10.233 | 3.944 | 0.854 | 31.591 | 46.155 | \ | 96.217 |       |      |      |
| grain2-14   | 2.335 | \ | 0.752 | 0.453 | \     | \     | 10.368 | 3.822 | 0.904 | 31.510 | 46.248 | \ | 96.392 |       |      |      |
| grain2-15   | 2.301 | \ | 0.755 | 0.436 | \     | 0.029 | 10.411 | 3.651 | 0.856 | 31.602 | 46.009 | \ | 96.050 |       |      |      |
| grain2-16   | 2.242 | \ | 0.746 | 0.432 | \     | \     | 10.303 | 3.960 | 0.807 | 31.492 | 46.231 | \ | 96.213 |       |      |      |
| grain2-17   | 2.264 | \ | 0.790 | 0.438 | \     | 0.031 | 10.623 | 3.805 | 0.888 | 31.637 | 46.493 | \ | 96.969 |       |      |      |
| grain2-18   | 2.364 | \ | 0.729 | 0.409 | \     | 0.038 | 10.536 | 3.927 | 0.876 | 31.654 | 46.663 | \ | 97.196 |       |      |      |
| grain2-19   | 2.243 | \ | 0.762 | 0.425 | \     | 0.030 | 10.361 | 3.701 | 0.781 | 31.587 | 46.458 | \ | 96.348 |       |      |      |
| grain2-20   | 2.211 | \ | 0.716 | 0.437 | \     | \     | 10.316 | 3.897 | 0.837 | 31.655 | 46.353 | \ | 96.422 |       |      |      |
| grain2-21   | 2.271 | \ | 0.762 | 0.448 | 0.035 | \     | 10.355 | 3.851 | 0.836 | 31.715 | 46.427 | \ | 96.700 |       |      |      |
| grain2-22   | 2.267 | \ | 0.748 | 0.427 | 0.040 | \     | 10.225 | 3.804 | 0.838 | 31.557 | 46.695 | \ | 96.601 |       |      |      |
| grain2-23   | 2.198 | \ | 0.719 | 0.401 | \     | 0.045 | 10.369 | 3.837 | 0.890 | 31.436 | 46.303 | \ | 96.198 |       |      |      |
| grain2-24   | 2.216 | \ | 0.700 | 0.439 | \     | \     | 10.461 | 3.319 | 0.853 | 31.371 | 46.294 | \ | 95.653 |       |      |      |
| grain2-25   | 2.258 | \ | 0.710 | 0.438 | \     | \     | 10.499 | 3.863 | 0.894 | 31.521 | 46.545 | \ | 96.728 |       |      |      |
| grain2-26   | 2.175 | \ | 0.748 | 0.435 | \     | 0.029 | 10.549 | 3.909 | 0.867 | 31.547 | 46.229 | \ | 96.488 |       |      |      |
| grain2-27   | 2.223 | \ | 0.713 | 0.431 | 0.044 | \     | 10.655 | 3.777 | 0.809 | 31.694 | 46.488 | \ | 96.834 |       |      |      |
| grain2-28   | 2.279 | \ | 0.705 | 0.423 | \     | \     | 10.281 | 3.779 | 0.828 | 31.665 | 46.403 | \ | 96.363 |       |      |      |
| grain2-29   | 2.267 | \ | 0.743 | 0.402 | \     | \     | 10.470 | 3.892 | 0.873 | 31.554 | 46.572 | \ | 96.773 |       |      |      |
| grain2-30   | 2.277 | \ | 0.793 | 0.420 | \     | \     | 10.383 | 3.796 | 0.879 | 31.557 | 46.413 | \ | 96.518 |       |      |      |
| grain2-31   | 2.205 | \ | 0.720 | 0.418 | \     | 0.030 | 10.469 | 3.599 | 0.863 | 31.567 | 46.656 | \ | 96.527 |       |      |      |
| grain2-32   | 2.247 | \ | 0.725 | 0.428 | \     | \     | 10.400 | 3.836 | 0.880 | 31.659 | 46.725 | \ | 96.900 |       |      |      |
| grain3-1-1  | 2.174 | \ | 0.739 | 0.411 | \     | \     | 10.484 | 3.890 | 0.845 | 31.638 | 47.288 | \ | 97.469 | 10.40 | 0.17 | 1.63 |
| grain3-1-2  | 2.202 | \ | 0.809 | 0.391 | 0.037 | \     | 10.356 | 3.749 | 0.849 | 31.484 | 46.964 | \ | 96.841 |       |      |      |
| grain3-1-3  | 2.100 | \ | 0.805 | 0.410 | \     | \     | 10.473 | 3.722 | 0.846 | 31.430 | 46.712 | \ | 96.498 |       |      |      |
| grain3-1-4  | 2.118 | \ | 0.772 | 0.380 | \     | \     | 10.299 | 3.846 | 0.841 | 31.086 | 46.308 | \ | 95.650 |       |      |      |
| grain3-1-5  | 2.173 | \ | 0.775 | 0.402 | 0.039 | \     | 10.461 | 4.031 | 0.888 | 31.491 | 46.721 | \ | 96.981 |       |      |      |
| grain3-1-6  | 2.101 | \ | 0.786 | 0.383 | \     | \     | 10.284 | 4.013 | 0.782 | 31.399 | 46.507 | \ | 96.255 |       |      |      |
| grain3-1-7  | 2.221 | \ | 0.802 | 0.405 | \     | \     | 10.544 | 3.853 | 0.840 | 31.421 | 46.892 | \ | 96.978 |       |      |      |
| grain3-1-8  | 2.181 | \ | 0.806 | 0.427 | \     | \     | 10.362 | 3.912 | 0.777 | 31.272 | 46.844 | \ | 96.581 |       |      |      |
| grain3-1-9  | 2.175 | \ | 0.806 | 0.371 | \     | \     | 10.408 | 3.883 | 0.846 | 31.332 | 46.760 | \ | 96.581 |       |      |      |
| grain3-1-10 | 2.213 | \ | 0.827 | 0.404 | \     | \     | 10.457 | 3.921 | 0.853 | 31.491 | 46.669 | \ | 96.835 |       |      |      |
| grain3-1-11 | 2.150 | \ | 0.769 | 0.421 | \     | \     | 10.427 | 3.837 | 0.833 | 31.528 | 46.761 | \ | 96.726 |       |      |      |
| grain3-1-12 | 2.173 | \ | 0.832 | 0.374 | \     | \     | 10.438 | 3.987 | 0.842 | 31.707 | 46.793 | \ | 97.146 |       |      |      |
| grain3-1-13 | 2.167 | \ | 0.793 | 0.426 | \     | \     | 10.443 | 3.933 | 0.806 | 31.419 | 46.995 | \ | 96.982 |       |      |      |
| grain3-1-14 | 2.147 | \ | 0.812 | 0.397 | 0.033 | \     | 10.499 | 3.805 | 0.854 | 31.451 | 46.817 | \ | 96.815 |       |      |      |
| grain3-1-15 | 2.048 | \ | 0.792 | 0.403 | 0.047 | \     | 10.343 | 3.782 | 0.813 | 31.782 | 47.223 | \ | 97.233 |       |      |      |
| grain3-1-16 | 2.159 | \ | 0.749 | 0.431 | 0.034 | \     | 10.417 | 3.892 | 0.864 | 31.329 | 46.894 | \ | 96.769 |       |      |      |
| grain3-1-17 | 2.184 | \ | 0.801 | 0.410 | \     | 0.030 | 10.415 | 3.928 | 0.847 | 31.406 | 46.859 | \ | 96.880 |       |      |      |
| grain3-1-18 | 2.202 | \ | 0.787 | 0.393 | \     | \     | 10.474 | 4.079 | 0.850 | 31.647 | 46.934 | \ | 97.366 |       |      |      |
| grain3-1-19 | 2.186 | \ | 0.797 | 0.400 | \     | 0.031 | 10.388 | 3.880 | 0.815 | 31.298 | 46.714 | \ | 96.509 |       |      |      |
| grain3-1-20 | 2.125 | \ | 0.777 | 0.396 | \     | \     | 10.247 | 3.913 | 0.830 | 31.477 | 47.085 | \ | 96.850 |       |      |      |

|             |       |   |       |       |       |       |        |       |       |        |        |   |        |       |      |      |  |
|-------------|-------|---|-------|-------|-------|-------|--------|-------|-------|--------|--------|---|--------|-------|------|------|--|
| grain3-1-21 | 2.121 | \ | 0.779 | 0.404 | \     | \     | 10.218 | 4.008 | 0.836 | 31.410 | 46.735 | \ | 96.511 |       |      |      |  |
| grain3-1-22 | 2.116 | \ | 0.814 | 0.431 | \     | \     | 10.407 | 3.776 | 0.790 | 31.286 | 46.929 | \ | 96.549 |       |      |      |  |
| grain3-1-23 | 2.219 | \ | 0.812 | 0.399 | 0.033 | 0.028 | 10.460 | 3.999 | 0.872 | 31.346 | 46.888 | \ | 97.056 |       |      |      |  |
| grain3-1-24 | 2.162 | \ | 0.773 | 0.416 | \     | \     | 10.426 | 3.938 | 0.828 | 31.391 | 47.178 | \ | 97.112 |       |      |      |  |
| grain3-1-25 | 2.150 | \ | 0.757 | 0.418 | 0.035 | \     | 10.317 | 4.132 | 0.898 | 31.483 | 46.970 | \ | 97.160 |       |      |      |  |
| grain3-1-26 | 2.138 | \ | 0.789 | 0.410 | 0.043 | \     | 10.319 | 3.861 | 0.838 | 31.521 | 47.098 | \ | 97.017 |       |      |      |  |
| grain3-1-27 | 2.272 | \ | 0.847 | 0.402 | \     | \     | 10.464 | 4.059 | 0.843 | 31.375 | 46.989 | \ | 97.251 |       |      |      |  |
| grain3-1-28 | 2.124 | \ | 0.807 | 0.393 | 0.040 | \     | 10.551 | 4.093 | 0.813 | 31.287 | 47.040 | \ | 97.148 |       |      |      |  |
| grain3-1-29 | 2.112 | \ | 0.847 | 0.374 | \     | 0.035 | 10.336 | 4.001 | 0.818 | 31.432 | 46.889 | \ | 96.844 |       |      |      |  |
| grain3-1-30 | 2.194 | \ | 0.721 | 0.410 | \     | \     | 10.469 | 3.940 | 0.824 | 31.263 | 46.880 | \ | 96.701 |       |      |      |  |
| grain3-1-31 | 2.120 | \ | 0.803 | 0.412 | \     | \     | 10.469 | 4.096 | 0.836 | 31.522 | 46.651 | \ | 96.909 |       |      |      |  |
| grain3-1-32 | 2.180 | \ | 0.849 | 0.395 | \     | \     | 10.326 | 4.115 | 0.829 | 31.443 | 46.411 | \ | 96.548 |       |      |      |  |
| grain3-1-33 | 2.191 | \ | 0.792 | 0.422 | 0.046 | \     | 10.417 | 3.926 | 0.899 | 31.594 | 47.197 | \ | 97.484 |       |      |      |  |
| grain3-1-34 | 2.158 | \ | 0.823 | 0.402 | 0.039 | \     | 10.511 | 3.825 | 0.788 | 31.185 | 46.471 | \ | 96.202 |       |      |      |  |
| grain3-1-35 | 2.187 | \ | 0.789 | 0.404 | \     | \     | 10.422 | 3.914 | 0.845 | 31.228 | 46.644 | \ | 96.433 |       |      |      |  |
| grain3-1-36 | 2.088 | \ | 0.819 | 0.374 | \     | \     | 10.395 | 3.935 | 0.853 | 31.392 | 46.356 | \ | 96.212 |       |      |      |  |
| grain3-1-37 | 2.145 | \ | 0.808 | 0.378 | 0.033 | \     | 10.488 | 3.814 | 0.827 | 31.134 | 46.498 | \ | 96.125 |       |      |      |  |
| grain3-1-38 | 2.118 | \ | 0.783 | 0.404 | \     | \     | 10.319 | 3.880 | 0.815 | 31.216 | 46.915 | \ | 96.450 |       |      |      |  |
| grain3-1-39 | 2.217 | \ | 0.798 | 0.386 | \     | \     | 10.468 | 3.860 | 0.828 | 31.278 | 46.284 | \ | 96.119 |       |      |      |  |
| grain3-1-40 | 2.249 | \ | 0.790 | 0.413 | \     | \     | 10.276 | 3.744 | 0.872 | 31.153 | 46.379 | \ | 95.876 |       |      |      |  |
| grain3-1-41 | 2.349 | \ | 0.799 | 0.402 | 0.038 | \     | 10.223 | 3.979 | 0.825 | 30.964 | 46.150 | \ | 95.729 |       |      |      |  |
| grain3-1-42 | 2.029 | \ | 0.799 | 0.392 | 0.051 | \     | 10.402 | 4.029 | 0.876 | 31.555 | 47.059 | \ | 97.192 |       |      |      |  |
| grain3-2-1  | 2.316 | \ | 0.757 | 0.393 | 0.040 | \     | 10.354 | 3.953 | 0.783 | 30.835 | 45.760 | \ | 95.191 | 10.37 | 0.25 | 2.41 |  |
| grain3-2-2  | 2.247 | \ | 0.785 | 0.402 | \     | \     | 10.392 | 3.913 | 0.826 | 30.710 | 46.039 | \ | 95.314 |       |      |      |  |
| grain3-2-3  | 2.382 | \ | 0.799 | 0.401 | 0.034 | 0.030 | 10.156 | 3.902 | 0.761 | 29.928 | 44.332 | \ | 92.725 |       |      |      |  |
| grain3-2-4  | 2.270 | \ | 0.795 | 0.390 | \     | \     | 10.379 | 3.964 | 0.752 | 30.334 | 45.365 | \ | 94.249 |       |      |      |  |
| grain3-2-5  | 2.318 | \ | 0.811 | 0.410 | \     | \     | 10.444 | 3.886 | 0.760 | 30.555 | 45.545 | \ | 94.729 |       |      |      |  |
| grain3-2-6  | 2.189 | \ | 0.826 | 0.430 | \     | \     | 10.331 | 3.789 | 0.850 | 30.785 | 45.832 | \ | 95.032 |       |      |      |  |
| grain3-2-7  | 2.218 | \ | 0.815 | 0.384 | \     | \     | 10.523 | 4.031 | 0.841 | 31.014 | 46.298 | \ | 96.124 |       |      |      |  |
| grain3-2-8  | 2.166 | \ | 0.846 | 0.378 | 0.061 | \     | 10.429 | 3.937 | 0.832 | 31.275 | 46.456 | \ | 96.380 |       |      |      |  |
| grain3-2-9  | 2.233 | \ | 0.834 | 0.388 | \     | \     | 10.450 | 3.750 | 0.844 | 31.181 | 46.544 | \ | 96.224 |       |      |      |  |
| grain3-2-10 | 2.256 | \ | 0.813 | 0.399 | \     | \     | 10.398 | 3.857 | 0.836 | 31.194 | 46.333 | \ | 96.086 |       |      |      |  |
| grain3-2-11 | 2.206 | \ | 0.832 | 0.397 | \     | \     | 10.491 | 3.801 | 0.820 | 31.212 | 46.825 | \ | 96.584 |       |      |      |  |
| grain3-2-12 | 2.280 | \ | 0.796 | 0.410 | \     | \     | 10.410 | 3.711 | 0.790 | 31.256 | 46.412 | \ | 96.065 |       |      |      |  |
| grain3-2-13 | 2.187 | \ | 0.809 | 0.393 | 0.037 | \     | 10.465 | 4.028 | 0.874 | 31.545 | 47.011 | \ | 97.349 |       |      |      |  |
| grain3-2-14 | 2.216 | \ | 0.834 | 0.397 | \     | \     | 10.446 | 4.103 | 0.820 | 31.241 | 47.065 | \ | 97.122 |       |      |      |  |
| grain3-2-15 | 2.182 | \ | 0.732 | 0.391 | \     | 0.032 | 10.491 | 3.813 | 0.884 | 31.385 | 46.830 | \ | 96.740 |       |      |      |  |
| grain3-2-16 | 2.154 | \ | 0.782 | 0.365 | \     | \     | 10.444 | 4.137 | 0.789 | 31.599 | 46.886 | \ | 97.156 |       |      |      |  |
| grain3-2-17 | 2.240 | \ | 0.806 | 0.410 | 0.035 | \     | 10.251 | 3.944 | 0.829 | 31.598 | 46.965 | \ | 97.078 |       |      |      |  |
| grain3-2-18 | 2.146 | \ | 0.834 | 0.402 | \     | \     | 10.212 | 3.880 | 0.867 | 31.156 | 46.697 | \ | 96.194 |       |      |      |  |
| grain3-2-19 | 2.175 | \ | 0.806 | 0.406 | 0.050 | \     | 10.515 | 3.793 | 0.832 | 31.434 | 47.055 | \ | 97.066 |       |      |      |  |
| grain3-2-20 | 2.117 | \ | 0.800 | 0.416 | \     | \     | 10.235 | 3.975 | 0.831 | 31.350 | 46.621 | \ | 96.345 |       |      |      |  |
| grain3-2-21 | 2.217 | \ | 0.801 | 0.432 | 0.033 | \     | 10.118 | 3.815 | 0.809 | 31.434 | 46.930 | \ | 96.589 |       |      |      |  |
| grain3-2-22 | 2.184 | \ | 0.793 | 0.335 | \     | \     | 10.515 | 3.879 | 0.818 | 31.195 | 46.225 | \ | 95.944 |       |      |      |  |
| grain3-2-23 | 2.186 | \ | 0.776 | 0.401 | \     | \     | 10.436 | 3.866 | 0.810 | 31.290 | 46.547 | \ | 96.312 |       |      |      |  |
| grain3-2-24 | 2.027 | \ | 0.778 | 0.392 | 0.038 | \     | 10.434 | 3.883 | 0.827 | 31.348 | 46.945 | \ | 96.672 |       |      |      |  |
| grain3-2-25 | 2.078 | \ | 0.792 | 0.364 | \     | \     | 10.437 | 3.802 | 0.835 | 31.646 | 46.918 | \ | 96.872 |       |      |      |  |
| grain3-2-26 | 2.168 | \ | 0.775 | 0.400 | 0.039 | \     | 10.372 | 3.830 | 0.824 | 31.169 | 46.894 | \ | 96.471 |       |      |      |  |

|             |       |   |       |       |       |       |        |       |       |        |        |   |        |       |      |      |
|-------------|-------|---|-------|-------|-------|-------|--------|-------|-------|--------|--------|---|--------|-------|------|------|
| grain3-2-27 | 2.171 | \ | 0.762 | 0.428 | 0.051 | \     | 10.289 | 4.007 | 0.805 | 31.367 | 46.578 | \ | 96.458 |       |      |      |
| grain3-2-28 | 2.199 | \ | 0.815 | 0.416 | \     | \     | 10.301 | 3.851 | 0.807 | 31.357 | 46.972 | \ | 96.718 |       |      |      |
| grain3-2-29 | 2.225 | \ | 0.777 | 0.416 | \     | 0.030 | 10.385 | 4.030 | 0.857 | 31.144 | 46.625 | \ | 96.489 |       |      |      |
| grain3-2-30 | 2.140 | \ | 0.787 | 0.436 | 0.047 | \     | 10.248 | 4.085 | 0.814 | 31.324 | 46.407 | \ | 96.288 |       |      |      |
| grain3-2-31 | 2.187 | \ | 0.768 | 0.415 | \     | \     | 10.596 | 4.039 | 0.859 | 31.182 | 46.645 | \ | 96.691 |       |      |      |
| grain3-2-32 | 1.896 | \ | 0.745 | 0.407 | \     | \     | 10.205 | 3.882 | 0.913 | 31.739 | 47.016 | \ | 96.803 |       |      |      |
| grain3-2-33 | 2.073 | \ | 0.749 | 0.303 | 0.041 | \     | 10.254 | 3.934 | 0.829 | 30.662 | 46.027 | \ | 94.872 |       |      |      |
| grain3-2-34 | 2.169 | \ | 0.756 | 0.396 | \     | \     | 10.492 | 3.830 | 0.776 | 31.487 | 47.143 | \ | 97.049 |       |      |      |
| grain3-2-35 | 2.057 | \ | 0.756 | 0.411 | \     | \     | 10.485 | 3.978 | 0.856 | 31.634 | 46.962 | \ | 97.139 |       |      |      |
| grain3-2-36 | 2.101 | \ | 0.772 | 0.415 | 0.042 | \     | 10.207 | 3.837 | 0.816 | 31.319 | 46.309 | \ | 95.818 |       |      |      |
| grain3-2-37 | 2.130 | \ | 0.760 | 0.412 | \     | \     | 10.415 | 3.697 | 0.837 | 31.244 | 46.480 | \ | 95.975 |       |      |      |
| grain3-2-38 | 2.117 | \ | 0.764 | 0.418 | \     | \     | 10.401 | 3.754 | 0.813 | 31.250 | 46.628 | \ | 96.145 |       |      |      |
| grain3-2-39 | 2.233 | \ | 0.856 | 0.418 | \     | \     | 10.192 | 3.889 | 0.805 | 31.001 | 46.324 | \ | 95.718 |       |      |      |
| grain3-2-40 | 2.087 | \ | 0.863 | 0.415 | 0.034 | \     | 10.394 | 4.057 | 0.868 | 31.280 | 46.679 | \ | 96.677 |       |      |      |
| grain3-2-41 | 2.227 | \ | 0.827 | 0.418 | \     | \     | 10.178 | 4.017 | 0.844 | 31.364 | 46.645 | \ | 96.520 |       |      |      |
| grain3-2-42 | 2.282 | \ | 0.792 | 0.395 | \     | \     | 10.512 | 3.955 | 0.826 | 31.401 | 46.844 | \ | 97.007 |       |      |      |
| grain3-2-43 | 2.247 | \ | 0.817 | 0.411 | \     | \     | 10.081 | 4.007 | 0.816 | 31.289 | 47.008 | \ | 96.676 |       |      |      |
| grain3-2-44 | 2.211 | \ | 0.769 | 0.407 | 0.050 | \     | 10.493 | 3.984 | 0.862 | 31.529 | 46.764 | \ | 97.069 |       |      |      |
| grain3-2-45 | 2.055 | \ | 0.757 | 0.393 | \     | \     | 10.286 | 4.081 | 0.828 | 31.495 | 46.607 | \ | 96.502 |       |      |      |
| grain3-2-46 | 2.189 | \ | 0.809 | 0.434 | 0.042 | \     | 10.527 | 4.149 | 0.907 | 31.836 | 47.399 | \ | 98.292 |       |      |      |
| grain3-3-1  | 2.245 | \ | 0.810 | 0.405 | \     | \     | 10.278 | 3.796 | 0.790 | 30.623 | 46.234 | \ | 95.181 | 10.35 | 0.22 | 2.13 |
| grain3-3-2  | 2.278 | \ | 0.786 | 0.409 | \     | \     | 10.305 | 3.867 | 0.865 | 30.900 | 45.992 | \ | 95.402 |       |      |      |
| grain3-3-3  | 2.253 | \ | 0.808 | 0.391 | \     | \     | 10.379 | 4.013 | 0.818 | 30.808 | 45.756 | \ | 95.226 |       |      |      |
| grain3-3-4  | 2.222 | \ | 0.802 | 0.402 | \     | \     | 10.262 | 3.830 | 0.816 | 30.982 | 46.124 | \ | 95.440 |       |      |      |
| grain3-3-5  | 2.174 | \ | 0.791 | 0.403 | \     | \     | 10.241 | 4.058 | 0.837 | 30.807 | 45.835 | \ | 95.146 |       |      |      |
| grain3-3-6  | 2.201 | \ | 0.785 | 0.301 | 0.039 | \     | 10.314 | 3.944 | 0.798 | 30.958 | 45.987 | \ | 95.327 |       |      |      |
| grain3-3-7  | 2.216 | \ | 0.798 | 0.415 | 0.035 | \     | 10.351 | 3.920 | 0.834 | 31.176 | 46.375 | \ | 96.120 |       |      |      |
| grain3-3-8  | 2.198 | \ | 0.803 | 0.400 | 0.045 | 0.041 | 10.414 | 4.104 | 0.854 | 31.311 | 46.833 | \ | 97.003 |       |      |      |
| grain3-3-9  | 2.170 | \ | 0.783 | 0.396 | 0.068 | \     | 10.337 | 4.063 | 0.894 | 31.243 | 46.399 | \ | 96.353 |       |      |      |
| grain3-3-10 | 2.103 | \ | 0.816 | 0.406 | 0.038 | \     | 10.104 | 3.990 | 0.809 | 31.561 | 46.634 | \ | 96.461 |       |      |      |
| grain3-3-11 | 2.181 | \ | 0.792 | 0.414 | \     | \     | 10.228 | 3.999 | 0.834 | 31.063 | 46.640 | \ | 96.151 |       |      |      |
| grain3-3-12 | 2.151 | \ | 0.807 | 0.398 | 0.045 | \     | 10.321 | 4.172 | 0.813 | 31.193 | 46.493 | \ | 96.393 |       |      |      |
| grain3-3-13 | 2.234 | \ | 0.841 | 0.398 | \     | \     | 10.509 | 3.944 | 0.804 | 31.071 | 46.331 | \ | 96.132 |       |      |      |
| grain3-3-14 | 2.242 | \ | 0.821 | 0.405 | 0.054 | \     | 10.421 | 3.927 | 0.828 | 31.348 | 46.534 | \ | 96.580 |       |      |      |
| grain3-3-15 | 2.170 | \ | 0.763 | 0.396 | 0.034 | \     | 10.453 | 3.923 | 0.813 | 31.262 | 46.354 | \ | 96.168 |       |      |      |
| grain3-3-16 | 2.306 | \ | 0.799 | 0.389 | \     | \     | 10.188 | 3.636 | 0.843 | 30.984 | 46.161 | \ | 95.306 |       |      |      |
| grain3-3-17 | 2.239 | \ | 0.808 | 0.395 | \     | \     | 10.391 | 3.798 | 0.865 | 31.428 | 46.816 | \ | 96.740 |       |      |      |
| grain3-3-18 | 2.213 | \ | 0.816 | 0.390 | 0.033 | \     | 10.366 | 4.095 | 0.838 | 31.242 | 46.291 | \ | 96.284 |       |      |      |
| grain3-3-19 | 2.177 | \ | 0.823 | 0.404 | 0.034 | \     | 10.277 | 4.024 | 0.901 | 30.988 | 46.556 | \ | 96.184 |       |      |      |
| grain3-3-20 | 2.060 | \ | 0.799 | 0.406 | 0.034 | \     | 10.327 | 3.854 | 0.858 | 31.220 | 46.503 | \ | 96.061 |       |      |      |
| grain3-3-21 | 2.097 | \ | 0.850 | 0.409 | \     | \     | 10.474 | 3.988 | 0.836 | 31.535 | 46.559 | \ | 96.748 |       |      |      |
| grain3-3-22 | 2.191 | \ | 0.755 | 0.398 | 0.040 | \     | 10.334 | 3.976 | 0.831 | 31.331 | 46.515 | \ | 96.371 |       |      |      |
| grain3-3-23 | 2.123 | \ | 0.753 | 0.413 | \     | \     | 10.441 | 4.169 | 0.863 | 31.317 | 46.599 | \ | 96.678 |       |      |      |
| grain3-3-24 | 2.186 | \ | 0.783 | 0.379 | \     | \     | 10.627 | 4.056 | 0.823 | 31.417 | 46.449 | \ | 96.720 |       |      |      |
| grain3-3-25 | 2.208 | \ | 0.804 | 0.407 | \     | \     | 10.476 | 3.968 | 0.804 | 31.141 | 46.737 | \ | 96.545 |       |      |      |
| grain3-3-26 | 2.078 | \ | 0.761 | 0.383 | 0.045 | \     | 10.324 | 3.963 | 0.880 | 31.102 | 46.610 | \ | 96.146 |       |      |      |
| grain3-3-27 | 2.056 | \ | 0.756 | 0.400 | \     | \     | 10.147 | 4.033 | 0.847 | 31.541 | 47.015 | \ | 96.795 |       |      |      |
| grain3-3-28 | 2.146 | \ | 0.766 | 0.415 | 0.036 | \     | 10.202 | 3.977 | 0.851 | 31.378 | 47.090 | \ | 96.861 |       |      |      |

|             |       |   |       |       |       |       |        |       |       |        |        |   |        |       |      |      |
|-------------|-------|---|-------|-------|-------|-------|--------|-------|-------|--------|--------|---|--------|-------|------|------|
| grain3-3-29 | 2.153 | \ | 0.803 | 0.391 | 0.033 | \     | 10.145 | 3.654 | 0.824 | 31.431 | 46.876 | \ | 96.310 |       |      |      |
| grain3-3-30 | 2.320 | \ | 0.810 | 0.397 | 0.051 | \     | 10.354 | 3.972 | 0.797 | 31.291 | 46.382 | \ | 96.374 |       |      |      |
| grain3-3-31 | 2.140 | \ | 0.800 | 0.421 | \     | 0.036 | 10.281 | 4.065 | 0.854 | 31.363 | 46.723 | \ | 96.683 |       |      |      |
| grain3-3-32 | 2.204 | \ | 0.793 | 0.402 | 0.037 | \     | 10.552 | 3.745 | 0.866 | 31.188 | 46.716 | \ | 96.503 |       |      |      |
| grain3-3-33 | 2.018 | \ | 0.782 | 0.361 | 0.036 | 0.032 | 10.289 | 3.623 | 0.811 | 31.441 | 46.756 | \ | 96.149 |       |      |      |
| grain3-3-34 | 2.181 | \ | 0.790 | 0.403 | \     | \     | 10.369 | 4.002 | 0.819 | 31.317 | 46.890 | \ | 96.771 |       |      |      |
| grain3-3-35 | 2.060 | \ | 0.795 | 0.388 | 0.060 | \     | 10.387 | 4.128 | 0.826 | 31.596 | 46.677 | \ | 96.917 |       |      |      |
| grain3-3-36 | 2.093 | \ | 0.798 | 0.391 | 0.049 | \     | 10.392 | 4.116 | 0.866 | 31.500 | 46.739 | \ | 96.944 |       |      |      |
| grain3-3-37 | 2.203 | \ | 0.814 | 0.408 | \     | \     | 10.336 | 3.895 | 0.871 | 31.357 | 46.609 | \ | 96.493 |       |      |      |
| grain3-3-38 | 2.173 | \ | 0.817 | 0.397 | \     | \     | 10.342 | 4.073 | 0.801 | 31.387 | 46.528 | \ | 96.518 |       |      |      |
| grain3-3-39 | 2.185 | \ | 0.816 | 0.391 | \     | \     | 10.372 | 3.770 | 0.856 | 31.448 | 46.690 | \ | 96.528 |       |      |      |
| grain3-3-40 | 2.262 | \ | 0.787 | 0.416 | 0.043 | \     | 10.306 | 3.967 | 0.907 | 31.313 | 46.542 | \ | 96.543 |       |      |      |
| grain3-3-41 | 2.229 | \ | 0.825 | 0.409 | \     | \     | 10.416 | 4.035 | 0.797 | 31.505 | 46.300 | \ | 96.516 |       |      |      |
| grain3-3-42 | 2.141 | \ | 0.801 | 0.403 | 0.037 | \     | 10.324 | 3.771 | 0.836 | 31.477 | 46.478 | \ | 96.268 |       |      |      |
| grain3-3-43 | 2.256 | \ | 0.805 | 0.394 | 0.049 | \     | 10.529 | 3.740 | 0.807 | 31.407 | 46.413 | \ | 96.400 |       |      |      |
| grain3-3-44 | 2.184 | \ | 0.796 | 0.371 | 0.045 | \     | 10.400 | 3.748 | 0.845 | 31.142 | 46.468 | \ | 95.999 |       |      |      |
| grain4-1    | 1.874 | \ | 0.685 | 0.490 | \     | \     | 10.188 | 3.715 | 0.792 | 31.098 | 45.253 | \ | 94.095 | 10.40 | 0.25 | 2.40 |
| grain4-2    | 1.907 | \ | 0.617 | 0.547 | 0.034 | \     | 10.334 | 3.744 | 0.780 | 31.629 | 45.933 | \ | 95.525 |       |      |      |
| grain4-3    | 1.912 | \ | 0.650 | 0.524 | \     | \     | 10.391 | 3.851 | 0.895 | 31.602 | 46.270 | \ | 96.095 |       |      |      |
| grain4-4    | 1.739 | \ | 0.616 | 0.500 | 0.040 | \     | 10.504 | 3.466 | 0.854 | 30.897 | 45.401 | \ | 94.017 |       |      |      |
| grain4-5    | 1.936 | \ | 0.636 | 0.525 | \     | \     | 10.696 | 3.624 | 0.807 | 31.552 | 45.754 | \ | 95.530 |       |      |      |
| grain4-6    | 1.852 | \ | 0.612 | 0.515 | \     | \     | 10.358 | 3.562 | 0.751 | 31.542 | 46.258 | \ | 95.450 |       |      |      |
| grain4-7    | 1.865 | \ | 0.592 | 0.534 | 0.037 | \     | 10.381 | 3.550 | 0.847 | 31.974 | 46.258 | \ | 96.038 |       |      |      |
| grain4-8    | 1.926 | \ | 0.581 | 0.502 | \     | \     | 10.268 | 3.292 | 0.876 | 31.702 | 46.338 | \ | 95.485 |       |      |      |
| grain4-9    | 1.970 | \ | 0.640 | 0.547 | \     | \     | 10.448 | 3.608 | 0.854 | 32.055 | 46.974 | \ | 97.096 |       |      |      |
| grain4-10   | 1.836 | \ | 0.633 | 0.558 | \     | \     | 10.295 | 3.663 | 0.819 | 32.112 | 46.715 | \ | 96.631 |       |      |      |
| grain4-11   | 1.972 | \ | 0.630 | 0.511 | \     | 0.030 | 10.430 | 3.647 | 0.823 | 31.771 | 46.509 | \ | 96.323 |       |      |      |
| grain4-12   | 2.004 | \ | 0.655 | 0.447 | \     | \     | 10.284 | 3.456 | 0.880 | 31.646 | 46.476 | \ | 95.848 |       |      |      |
| grain4-13   | 1.951 | \ | 0.612 | 0.524 | \     | \     | 10.356 | 3.613 | 0.842 | 31.932 | 46.532 | \ | 96.362 |       |      |      |
| grain4-14   | 2.011 | \ | 0.636 | 0.519 | \     | \     | 10.424 | 3.746 | 0.848 | 31.973 | 46.538 | \ | 96.695 |       |      |      |
| grain4-15   | 1.875 | \ | 0.665 | 0.506 | \     | \     | 10.191 | 3.741 | 0.877 | 31.656 | 46.776 | \ | 96.287 |       |      |      |
| grain4-16   | 1.956 | \ | 0.610 | 0.513 | 0.035 | \     | 10.554 | 3.662 | 0.864 | 31.849 | 46.592 | \ | 96.635 |       |      |      |
| grain4-17   | 1.924 | \ | 0.650 | 0.532 | \     | \     | 10.463 | 3.674 | 0.813 | 32.092 | 46.732 | \ | 96.880 |       |      |      |
| grain4-18   | 1.898 | \ | 0.654 | 0.545 | \     | \     | 10.351 | 3.729 | 0.899 | 32.089 | 46.661 | \ | 96.826 |       |      |      |
| grain4-19   | 1.934 | \ | 0.692 | 0.546 | 0.033 | 0.031 | 10.405 | 3.545 | 0.802 | 31.949 | 46.323 | \ | 96.260 |       |      |      |
| grain4-20   | 1.905 | \ | 0.627 | 0.505 | \     | \     | 10.501 | 3.531 | 0.887 | 31.887 | 46.475 | \ | 96.318 |       |      |      |
| grain4-21   | 1.982 | \ | 0.617 | 0.529 | \     | \     | 10.451 | 3.671 | 0.878 | 32.174 | 46.707 | \ | 97.009 |       |      |      |
| grain4-22   | 1.881 | \ | 0.660 | 0.526 | \     | 0.035 | 10.332 | 3.664 | 0.902 | 32.241 | 46.691 | \ | 96.932 |       |      |      |
| grain4-23   | 1.963 | \ | 0.609 | 0.487 | \     | \     | 10.614 | 3.649 | 0.876 | 32.010 | 47.058 | \ | 97.266 |       |      |      |

Note:

<sup>1</sup> D.L.(3σ): 3σ limit of detection.

<sup>2</sup> \: Result lower than 3σ limit of detection.
