# Supplementary material for: ZMT04 muscovite: a potential Paleoproterozoic reference material for 40Ar/39Ar dating
Source: Royal Society of Chemistry journal article supplement (doi:10.1039/d4ja00172a), 2024-01-01
Supplement: d4ja00172a2.pdf [file d4ja00172a2.pdf]

Table S2 Complete  $^{40}\text{Ar}/^{39}\text{Ar}$  data of the ZMT04 muscovite.

ZMT04-1, Analysed in GIGCAS, October 2021, J value =  $0.0038510 \pm 0.0.0000039$

| Step | Laser power | Step marked <sup>1</sup> | $^{36}\text{Ar}_{\text{air}}$<br>fA | $^{37}\text{Ar}_{\text{Ca}}$<br>fA | $^{38}\text{Ar}_{\text{Cl}}$<br>fA | $^{39}\text{Ar}_{\text{K}}$<br>fA | $^{40}\text{Ar}^{*2}$<br>fA | Age<br>(Ma) | $\pm 2s$ | $^{40}\text{Ar}(r)$<br>(%) | $^{39}\text{Ar}(k)$<br>(%) | K/Ca | $\pm 2s$ |
|------|-------------|--------------------------|-------------------------------------|------------------------------------|------------------------------------|-----------------------------------|-----------------------------|-------------|----------|----------------------------|----------------------------|------|----------|
| 1    | 2.5         |                          | 29.363                              | 0.000                              | 0.259                              | 43.717                            | 19093.300                   | 1783.95     | 10.83    | 68.53                      | 0.33                       | 1.3  | 0.39     |
| 2    | 3.5         |                          | 7.767                               | 0.000                              | 0.200                              | 75.569                            | 33065.622                   | 1786.05     | 5.90     | 93.45                      | 0.58                       | 2.1  | 0.60     |
| 3    | 4.0 %       | Δ                        | 9.036                               | 4.766                              | 0.651                              | 228.609                           | 99009.131                   | 1774.43     | 2.90     | 97.35                      | 1.74                       | 20.6 | 42.56    |
| 4    | 4.4 %       | Δ                        | 4.569                               | 5.666                              | 0.552                              | 198.371                           | 85964.329                   | 1775.11     | 3.17     | 98.44                      | 1.51                       | 15.1 | 26.20    |
| 5    | 4.7 %       | Δ                        | 1.401                               | 2.976                              | 0.330                              | 121.133                           | 52458.052                   | 1774.35     | 3.98     | 99.21                      | 0.92                       | 17.5 | 58.69    |
| 6    | 5.0 %       | Δ                        | 5.665                               | 11.244                             | 0.804                              | 304.131                           | 131692.588                  | 1774.22     | 2.65     | 98.73                      | 2.32                       | 11.6 | 10.32    |
| 7    | 5.4 %       | Δ                        | 2.778                               | 8.958                              | 0.694                              | 278.857                           | 120800.861                  | 1774.71     | 2.81     | 99.32                      | 2.13                       | 13.4 | 15.13    |
| 8    | 5.7 %       | Δ                        | 3.448                               | 4.764                              | 0.598                              | 233.900                           | 101329.259                  | 1774.76     | 2.84     | 98.99                      | 1.78                       | 21.1 | 44.56    |
| 9    | 6.0 %       | Δ                        | 5.071                               | 12.115                             | 0.993                              | 389.289                           | 168663.163                  | 1774.87     | 2.51     | 99.11                      | 2.97                       | 13.8 | 11.39    |
| 10   | 6.4 %       | Δ                        | 3.392                               | 6.046                              | 0.893                              | 390.219                           | 169073.781                  | 1774.92     | 2.53     | 99.40                      | 2.97                       | 27.8 | 47.11    |
| 11   | 6.7 %       | Δ                        | 3.732                               | 8.322                              | 1.175                              | 458.462                           | 198565.252                  | 1774.48     | 2.45     | 99.44                      | 3.49                       | 23.7 | 28.78    |
| 12   | 7.0 %       | Δ                        | 4.748                               | 20.428                             | 1.445                              | 532.560                           | 230960.017                  | 1775.96     | 2.43     | 99.39                      | 4.06                       | 11.2 | 6.09     |
| 13   | 7.4 %       | Δ                        | 4.432                               | 10.051                             | 1.584                              | 589.596                           | 255423.385                  | 1774.76     | 2.41     | 99.48                      | 4.49                       | 25.2 | 25.72    |
| 14   | 7.8 %       | Δ                        | 4.818                               | 28.152                             | 1.937                              | 677.451                           | 293651.038                  | 1775.40     | 2.41     | 99.51                      | 5.16                       | 10.3 | 4.15     |
| 15   | 8.3 %       | Δ                        | 3.075                               | 25.328                             | 1.702                              | 577.497                           | 250134.036                  | 1774.54     | 2.41     | 99.63                      | 4.40                       | 9.8  | 4.61     |
| 16   | 8.5 %       | Δ                        | 3.355                               | 15.314                             | 1.682                              | 616.057                           | 266932.659                  | 1774.95     | 2.42     | 99.63                      | 4.70                       | 17.3 | 12.41    |
| 17   | 9.0 %       | Δ                        | 4.451                               | 30.895                             | 2.162                              | 752.757                           | 326468.267                  | 1776.01     | 2.37     | 99.59                      | 5.74                       | 10.5 | 3.71     |
| 18   | 9.4 %       | Δ                        | 2.695                               | 16.070                             | 1.889                              | 647.391                           | 280455.703                  | 1774.74     | 2.42     | 99.71                      | 4.93                       | 17.3 | 12.00    |
| 19   | 9.7 %       | Δ                        | 2.144                               | 6.622                              | 1.333                              | 495.334                           | 214538.019                  | 1774.50     | 2.50     | 99.70                      | 3.78                       | 32.2 | 50.45    |
| 20   | 10.0 %      | Δ                        | 2.995                               | 12.030                             | 1.618                              | 555.170                           | 240616.733                  | 1775.26     | 2.46     | 99.63                      | 4.23                       | 19.8 | 18.75    |
| 21   | 10.3 %      | Δ                        | 1.615                               | 11.296                             | 1.435                              | 487.971                           | 211348.312                  | 1774.49     | 2.46     | 99.77                      | 3.72                       | 18.6 | 18.47    |
| 22   | 10.6 %      | Δ                        | 1.357                               | 4.500                              | 1.191                              | 463.071                           | 200606.760                  | 1774.74     | 2.48     | 99.80                      | 3.53                       | 44.3 | 111.05   |
| 23   | 11.0 %      | Δ                        | 1.123                               | 6.552                              | 1.172                              | 421.088                           | 182413.199                  | 1774.70     | 2.51     | 99.82                      | 3.21                       | 27.6 | 43.89    |
| 24   | 11.3 %      | Δ                        | 1.327                               | 4.678                              | 1.174                              | 417.961                           | 181074.205                  | 1774.80     | 2.50     | 99.78                      | 3.19                       | 38.4 | 91.16    |
| 25   | 11.6 %      | Δ                        | 0.871                               | 6.175                              | 0.918                              | 382.516                           | 165673.532                  | 1774.49     | 2.57     | 99.84                      | 2.92                       | 26.6 | 46.95    |
| 26   | 12.0 %      | Δ                        | 0.979                               | 4.921                              | 1.117                              | 428.510                           | 185675.312                  | 1774.98     | 2.55     | 99.84                      | 3.27                       | 37.4 | 79.03    |
| 27   | 12.5 %      | Δ                        | 1.187                               | 9.946                              | 1.357                              | 492.404                           | 213265.505                  | 1774.48     | 2.52     | 99.83                      | 3.75                       | 21.3 | 21.96    |
| 28   | 13.0 %      | Δ                        | 0.746                               | 2.867                              | 1.013                              | 419.670                           | 181895.300                  | 1775.30     | 2.57     | 99.88                      | 3.20                       | 62.9 | 230.08   |
| 29   | 13.5 %      | Δ                        | 0.897                               | 8.846                              | 1.306                              | 483.172                           | 209291.242                  | 1774.61     | 2.52     | 99.87                      | 3.68                       | 23.5 | 27.20    |
| 30   | 14.1 %      | Δ                        | 0.808                               | 15.695                             | 1.382                              | 495.087                           | 214557.823                  | 1775.17     | 2.51     | 99.89                      | 3.77                       | 13.6 | 9.42     |
| 31   | 14.7 %      | Δ                        | 0.677                               | 8.733                              | 1.032                              | 462.559                           | 200623.632                  | 1776.08     | 2.51     | 99.90                      | 3.53                       | 22.8 | 28.89    |

ZMT04-2, Analysed in Curtin University, May 2023, Singal-grain stepwise heating results, J value =  $0.0164368 \pm 0.0000090$

| Step | Laser power | Step marked <sup>1</sup> | $^{36}\text{Ar}_{\text{air}}$<br>V | $^{37}\text{Ar}_{\text{Ca}}$<br>V | $^{38}\text{Ar}_{\text{Cl}}$<br>V | $^{39}\text{Ar}_{\text{K}}$<br>V | $^{40}\text{Ar}^{*2}$<br>V | Age<br>(Ma) | $\pm 2s$ | $^{40}\text{Ar}(r)$<br>(%) | $^{39}\text{Ar}(k)$<br>(%) | K/Ca   | $\pm 2s$  |
|------|-------------|--------------------------|------------------------------------|-----------------------------------|-----------------------------------|----------------------------------|----------------------------|-------------|----------|----------------------------|----------------------------|--------|-----------|
| 1    | 0.5 %       | Δ                        | 0.0000102                          | 0.0004570                         | 0.0000000                         | 0.0003152                        | 0.036007                   | 1911.28     | 235.63   | 92.19                      | 0.17                       | 0.36   | 12.97     |
| 2    | 0.8 %       | Δ                        | 0.0001524                          | 0.0033466                         | 0.0000000                         | 0.0049319                        | 0.507253                   | 1789.62     | 14.64    | 91.77                      | 2.65                       | 0.77   | 3.63      |
| 3    | 1.0 %       | Δ                        | 0.0000093                          | 0.0000136                         | 0.0000000                         | 0.0150525                        | 1.526984                   | 1774.00     | 4.92     | 99.82                      | 8.09                       | 577.24 | 596691.58 |
| 4    | 1.2 %       | Δ                        | 0.0000033                          | 0.0032943                         | 0.0000000                         | 0.0127846                        | 1.298432                   | 1775.31     | 5.94     | 99.92                      | 6.87                       | 2.02   | 10.81     |
| 5    | 1.4 %       | Δ                        | 0.0000032                          | 0.0012695                         | 0.0000361                         | 0.0106711                        | 1.079984                   | 1771.35     | 6.85     | 99.91                      | 5.74                       | 4.37   | 44.06     |
| 6    | 1.6 %       | Δ                        | 0.0000004                          | 0.0073950                         | 0.0000000                         | 0.0070128                        | 0.712141                   | 1775.16     | 10.35    | 99.98                      | 3.77                       | 0.49   | 0.91      |
| 7    | 1.8 %       | Δ                        | 0.0000031                          | 0.0114302                         | 0.0000095                         | 0.0011087                        | 0.113734                   | 1786.65     | 65.49    | 100.83                     | 0.60                       | 0.05   | 0.08      |
| 8    | 2.1 %       | Δ                        | 0.0000011                          | 0.0054748                         | 0.0000957                         | 0.0003962                        | 0.041571                   | 1812.47     | 183.15   | 100.81                     | 0.21                       | 0.04   | 0.10      |

|    |        |   |           |           |           |           |          |         |           |        |       |       |        |
|----|--------|---|-----------|-----------|-----------|-----------|----------|---------|-----------|--------|-------|-------|--------|
| 9  | 2.4 %  | Δ | 0.0000018 | 0.0077013 | 0.0000000 | 0.0000542 | 0.009041 | 2386.38 | 1497.14   | 106.33 | 0.03  | 0.00  | 0.01   |
| 10 | 2.8 %  | Δ | 0.0000019 | 0.0048388 | 0.0000239 | 0.0000338 | 0.003527 | 1807.35 | 2170.44   | 86.33  | 0.02  | 0.00  | 0.01   |
| 11 | 3.5 %  | Δ | 0.0000009 | 0.0033273 | 0.0000255 | 0.0000219 | 0.002106 | 1712.79 | 3169.20   | 88.70  | 0.01  | 0.00  | 0.02   |
| 12 | 5.0 %  |   | 0.0000012 | 0.0021417 | 0.0000000 | 0.0000100 | 0.000008 | 23.90   | 4411.79   | 2.22   | 0.01  | 0.00  | 0.02   |
| 13 | 6.0 %  |   | 0.0000010 | 0.0042665 | 0.0000000 | 0.0000214 | 0.000617 | 1158.44 | 6168.98   | 185.85 | 0.01  | 0.00  | 0.01   |
| 14 | 6.5 %  |   | 0.0000002 | 0.0004796 | 0.0000520 | 0.0000195 | 0.000229 | 388.03  | 3161.54   | 146.04 | 0.01  | 0.02  | 0.65   |
| 15 | 7.0 %  |   | 0.0000017 | 0.0037281 | 0.0000000 | 0.0000221 | 0.000561 | 975.44  | 5095.27   | 860.17 | 0.01  | 0.00  | 0.01   |
| 16 | 10.0 % |   | 0.0000010 | 0.0028380 | 0.0000022 | 0.0000012 | 0.000026 | 570.66  | 37275.42  | 7.90   | 0.00  | 0.00  | 0.01   |
| 17 | 20.0 % |   | 0.0000011 | 0.0025577 | 0.0000000 | 0.0000024 | 0.000214 | 0.00    | 155639.13 | 38.48  | 0.00  | 0.00  | 0.01   |
| 18 | 35.0 % |   | 0.0000005 | 0.0088743 | 0.0000000 | 0.0000052 | 0.001042 | 0.00    | 31560.75  | 115.13 | 0.00  | 0.00  | 0.00   |
| 1  | 0.5 %  |   | 0.0000007 | 0.0013034 | 0.0000000 | 0.0000677 | 0.005329 | 1501.04 | 390.02    | 96.32  | 0.04  | 0.03  | 0.24   |
| 2  | 0.8 %  |   | 0.0000097 | 0.0003586 | 0.0000000 | 0.0000842 | 0.089200 | 1823.13 | 40.34     | 96.85  | 0.45  | 1.22  | 36.89  |
| 3  | 1.0 %  |   | 0.0000307 | 0.0032660 | 0.0000572 | 0.0063458 | 0.647789 | 1781.09 | 5.43      | 98.60  | 3.41  | 1.01  | 3.03   |
| 4  | 1.2 %  | Δ | 0.0000424 | 0.0042610 | 0.0000141 | 0.0375639 | 3.803742 | 1771.95 | 1.31      | 99.67  | 20.19 | 4.58  | 14.03  |
| 5  | 1.4 %  | Δ | 0.0000079 | 0.0016695 | 0.0000405 | 0.0200208 | 2.026648 | 1771.58 | 1.88      | 99.88  | 10.76 | 6.24  | 34.36  |
| 6  | 1.6 %  | Δ | 0.0000122 | 0.0011335 | 0.0000108 | 0.0306207 | 3.097190 | 1770.68 | 1.20      | 99.88  | 16.46 | 14.05 | 111.81 |
| 7  | 1.8 %  | Δ | 0.0000089 | 0.0043175 | 0.0000000 | 0.0159407 | 1.612035 | 1770.46 | 1.91      | 99.84  | 8.57  | 1.92  | 5.06   |
| 8  | 2.1 %  | Δ | 0.0000094 | 0.0084757 | 0.0000269 | 0.0098878 | 0.999963 | 1770.51 | 2.47      | 99.72  | 5.32  | 0.61  | 0.66   |
| 9  | 2.4 %  | Δ | 0.0000028 | 0.0004353 | 0.0000666 | 0.0062762 | 0.635350 | 1771.64 | 4.63      | 99.87  | 3.37  | 7.50  | 154.87 |
| 10 | 2.8 %  | Δ | 0.0000015 | 0.0019746 | 0.0000219 | 0.0024959 | 0.253978 | 1777.49 | 12.25     | 99.83  | 1.34  | 0.66  | 3.13   |
| 11 | 3.5 %  |   | 0.0000015 | 0.0008251 | 0.0000192 | 0.0019183 | 0.197216 | 1789.11 | 17.16     | 99.77  | 1.03  | 1.21  | 17.28  |
| 12 | 5.0 %  |   | 0.0000019 | 0.0041607 | 0.0000519 | 0.0002717 | 0.028892 | 1827.78 | 87.60     | 98.12  | 0.15  | 0.03  | 0.08   |
| 13 | 6.0 %  |   | 0.0000035 | 0.0076462 | 0.0000253 | 0.0001502 | 0.014871 | 1746.52 | 180.99    | 93.44  | 0.08  | 0.01  | 0.01   |
| 14 | 6.5 %  |   | 0.0000028 | 0.0036675 | 0.0000095 | 0.0000361 | 0.004768 | 2087.21 | 851.53    | 85.18  | 0.02  | 0.01  | 0.01   |
| 15 | 7.0 %  |   | 0.0000030 | 0.0043518 | 0.0000211 | 0.0000223 | 0.002388 | 1834.11 | 1053.17   | 72.94  | 0.01  | 0.00  | 0.01   |
| 16 | 10.0 % |   | 0.0000088 | 0.0049895 | 0.0000732 | 0.0000266 | 0.001812 | 1358.14 | 875.45    | 40.80  | 0.01  | 0.00  | 0.01   |
| 17 | 20.0 % |   | 0.0000703 | 0.0058395 | 0.0000000 | 0.0004989 | 0.035763 | 1407.65 | 49.61     | 63.00  | 0.27  | 0.04  | 0.09   |
| 18 | 35.0 % |   | 0.0001245 | 0.0083363 | 0.0000000 | 0.0007300 | 0.027715 | 876.83  | 33.56     | 42.72  | 0.39  | 0.05  | 0.06   |

ZMT04-2, Analysed in Curtin University, January 2024, Singal-grain total fusion results, J value = 0.0164368 ± 0.0000090

| Grain | Laser power | Step marked † | <sup>36</sup> Ar <sub>air</sub><br>V | <sup>37</sup> Ar <sub>Ca</sub><br>V | <sup>38</sup> Ar <sub>Cl</sub><br>V | <sup>39</sup> Ar <sub>K</sub><br>V | <sup>40</sup> Ar* <sup>2</sup><br>V | Age<br>(Ma) | ± 2s | <sup>40</sup> Ar(r)<br>(%) | <sup>39</sup> Ar(k)<br>(%) | K/Ca   | ± 2s         |
|-------|-------------|---------------|--------------------------------------|-------------------------------------|-------------------------------------|------------------------------------|-------------------------------------|-------------|------|----------------------------|----------------------------|--------|--------------|
| 1     | 8.0 %       | Δ             | 0.0002596                            | 0.0000155                           | 0.0000314                           | 0.1540169                          | 15.57246                            | 1770.26     | 0.78 | 99.50                      | 4.89                       | 5182   | 17540.71     |
| 2     | 10.0 %      | Δ             | 0.0004086                            | 0.0000252                           | 0.0000000                           | 0.3027839                          | 30.61876                            | 1770.43     | 1.20 | 99.60                      | 9.61                       | 6252   | 16608.78     |
| 3     | 8.0 %       | Δ             | 0.0003230                            | 0.0000377                           | 0.0000000                           | 0.0532531                          | 5.38725                             | 1770.87     | 1.19 | 98.24                      | 1.69                       | 734    | 1215.31      |
| 4     | 8.0 %       | Δ             | 0.0002026                            | 0.0000311                           | 0.0000238                           | 0.1131360                          | 11.45025                            | 1771.37     | 0.92 | 99.47                      | 3.59                       | 1890   | 3189.78      |
| 5     | 8.0 %       | Δ             | 0.0000900                            | 0.0000161                           | 0.0000302                           | 0.0408535                          | 4.13720                             | 1772.05     | 1.43 | 99.35                      | 1.30                       | 1317   | 4183.05      |
| 6     | 8.0 %       | Δ             | 0.0001874                            | 0.0000012                           | 0.0000000                           | 0.0456274                          | 4.62332                             | 1772.70     | 1.28 | 98.80                      | 1.45                       | 19273  | 946948.98    |
| 7     | 10.0 %      | Δ             | 0.0007781                            | 0.0000199                           | 0.0000000                           | 0.4473488                          | 45.33098                            | 1772.76     | 1.21 | 99.49                      | 14.20                      | 11663  | 36711.28     |
| 8     | 8.0 %       | Δ             | 0.0001110                            | 0.0000001                           | 0.0000401                           | 0.0940566                          | 9.53162                             | 1772.83     | 0.92 | 99.65                      | 2.98                       | 460386 | 276830796.18 |
| 9     | 8.0 %       | Δ             | 0.0000964                            | 0.0000324                           | 0.0000000                           | 0.0684391                          | 6.93626                             | 1772.94     | 1.06 | 99.59                      | 2.17                       | 1099   | 1714.54      |
| 10    | 8.0 %       | Δ             | 0.0001749                            | 0.0000032                           | 0.0000044                           | 0.1205458                          | 12.22041                            | 1773.24     | 0.84 | 99.57                      | 3.83                       | 19847  | 406895.49    |
| 11    | 8.0 %       | Δ             | 0.0001919                            | 0.0000506                           | 0.0000063                           | 0.1224101                          | 12.42160                            | 1774.35     | 0.91 | 99.54                      | 3.88                       | 1258   | 1237.05      |
| 12    | 15.0 %      | Δ             | 0.0003858                            | 0.0000147                           | 0.0000000                           | 0.0822162                          | 8.35178                             | 1775.55     | 1.15 | 98.64                      | 2.61                       | 2912   | 11159.73     |
| 13    | 8.0 %       | Δ             | 0.0004782                            | 0.0000118                           | 0.0000000                           | 0.0956386                          | 9.71980                             | 1776.08     | 0.98 | 98.55                      | 3.04                       | 4213   | 16909.60     |
| 14    | 8.0 %       | Δ             | 0.0001916                            | 0.0000336                           | 0.0000000                           | 0.0296722                          | 3.01608                             | 1776.25     | 1.79 | 98.14                      | 0.94                       | 459    | 740.63       |
| 15    | 8.0 %       | Δ             | 0.0001890                            | 0.0000263                           | 0.0000000                           | 0.1143278                          | 11.62222                            | 1776.37     | 0.87 | 99.52                      | 3.63                       | 2259   | 4621.64      |
| 16    | 10.0 %      | Δ             | 0.0009054                            | 0.0000274                           | 0.0000255                           | 0.4367761                          | 44.41695                            | 1776.77     | 1.21 | 99.39                      | 13.86                      | 8277   | 20471.26     |

|    |        |   |           |           |           |           |          |         |      |       |       |        |             |
|----|--------|---|-----------|-----------|-----------|-----------|----------|---------|------|-------|-------|--------|-------------|
| 17 | 8.0 %  | Δ | 0.0001190 | 0.0000090 | 0.0000069 | 0.0613706 | 6.24314  | 1777.17 | 1.19 | 99.43 | 1.95  | 3537   | 16984.34    |
| 18 | 10.0 % | Δ | 0.0006408 | 0.0000009 | 0.0000000 | 0.3126979 | 31.83639 | 1778.09 | 1.26 | 99.40 | 9.92  | 187347 | 18413111.18 |
| 19 | 8.0 %  |   | 0.0000578 | 0.0000374 | 0.0000000 | 0.0403513 | 4.12975  | 1784.01 | 1.57 | 99.58 | 1.28  | 561    | 770.46      |
| 20 | 8.0 %  |   | 0.0004032 | 0.0000128 | 0.0000000 | 0.4155151 | 42.77220 | 1790.57 | 0.72 | 99.72 | 13.19 | 16852  | 61800.43    |

ZMT04-3, Analysed in GIGCAS, September 2023, J value = 0.0010683 ± 0.0000011

| Step | Laser power | Step marked <sup>1</sup> | <sup>36</sup> Ar <sub>air</sub><br>fA | <sup>37</sup> Ar <sub>Ca</sub><br>fA | <sup>38</sup> Ar <sub>Cl</sub><br>fA | <sup>39</sup> Ar <sub>K</sub><br>fA | <sup>40</sup> Ar <sup>*2</sup><br>fA | Age<br>(Ma) | ± 2s  | <sup>40</sup> Ar(r)<br>(%) | <sup>39</sup> Ar(k)<br>(%) | K/Ca | ± 2s |
|------|-------------|--------------------------|---------------------------------------|--------------------------------------|--------------------------------------|-------------------------------------|--------------------------------------|-------------|-------|----------------------------|----------------------------|------|------|
| 1    | 3.5 %       |                          | 5.956                                 | 0.000                                | 0.055                                | 3.236                               | 4770.204                             | 1710.04     | 58.03 | 73.05                      | 0.19                       |      |      |
| 2    | 4.5 %       |                          | 3.765                                 | 0.000                                | 0.267                                | 13.030                              | 20489.242                            | 1782.47     | 15.32 | 94.85                      | 0.78                       |      |      |
| 3    | 6.0 %       | Δ                        | 8.454                                 | 0.000                                | 0.487                                | 36.297                              | 56510.847                            | 1771.23     | 6.99  | 95.77                      | 2.16                       |      |      |
| 4    | 7.5 %       | Δ                        | 4.342                                 | 0.000                                | 0.728                                | 55.526                              | 86425.968                            | 1770.92     | 5.84  | 98.54                      | 3.31                       |      |      |
| 5    | 9.0 %       | Δ                        | 3.219                                 | 0.000                                | 0.874                                | 65.021                              | 101407.832                           | 1773.19     | 5.43  | 99.07                      | 3.87                       |      |      |
| 6    | 10.5 %      | Δ                        | 10.461                                | 0.000                                | 1.006                                | 70.997                              | 110934.984                           | 1775.29     | 5.31  | 97.29                      | 4.23                       |      |      |
| 7    | 11.5 %      | Δ                        | 4.692                                 | 0.000                                | 0.886                                | 61.726                              | 96579.829                            | 1776.83     | 5.69  | 98.58                      | 3.68                       |      |      |
| 8    | 12.5 %      | Δ                        | 4.606                                 | 0.000                                | 0.914                                | 63.628                              | 98874.447                            | 1769.07     | 5.53  | 98.64                      | 3.79                       |      |      |
| 9    | 13.5 %      | Δ                        | 6.627                                 | 0.000                                | 0.868                                | 60.335                              | 93881.211                            | 1770.57     | 5.59  | 97.96                      | 3.59                       |      |      |
| 10   | 14.5 %      | Δ                        | 4.242                                 | 0.000                                | 0.867                                | 60.954                              | 95032.682                            | 1772.81     | 5.62  | 98.70                      | 3.63                       |      |      |
| 11   | 15.5 %      | Δ                        | 4.613                                 | 0.000                                | 1.053                                | 76.248                              | 118788.937                           | 1771.96     | 5.23  | 98.86                      | 4.54                       |      |      |
| 12   | 16.5 %      | Δ                        | 2.935                                 | 0.000                                | 0.758                                | 51.004                              | 79598.039                            | 1773.91     | 6.00  | 98.92                      | 3.04                       |      |      |
| 13   | 17.5 %      | Δ                        | 3.604                                 | 0.000                                | 0.678                                | 50.095                              | 78206.543                            | 1774.30     | 6.17  | 98.66                      | 2.98                       |      |      |
| 14   | 19.0 %      | Δ                        | 2.611                                 | 0.000                                | 0.788                                | 57.672                              | 90041.219                            | 1774.37     | 5.78  | 99.15                      | 3.43                       |      |      |
| 15   | 20.5 %      | Δ                        | 1.797                                 | 0.000                                | 0.823                                | 59.031                              | 92036.790                            | 1772.82     | 5.52  | 99.43                      | 3.52                       |      |      |
| 16   | 22.0 %      | Δ                        | 1.081                                 | 0.000                                | 0.730                                | 54.031                              | 84280.861                            | 1773.37     | 5.85  | 99.62                      | 3.22                       |      |      |
| 17   | 24.0 %      | Δ                        | 1.311                                 | 0.000                                | 1.086                                | 80.463                              | 125769.337                           | 1775.68     | 5.16  | 99.69                      | 4.79                       |      |      |
| 18   | 26.0 %      | Δ                        | 0.873                                 | 0.000                                | 1.093                                | 82.443                              | 128850.987                           | 1775.56     | 5.20  | 99.80                      | 4.91                       |      |      |
| 19   | 28.0 %      | Δ                        | 0.558                                 | 0.000                                | 1.257                                | 88.243                              | 138001.661                           | 1776.27     | 5.08  | 99.88                      | 5.25                       |      |      |
| 20   | 30.0 %      | Δ                        | 0.437                                 | 0.000                                | 1.332                                | 97.885                              | 153036.131                           | 1775.95     | 5.02  | 99.91                      | 5.83                       |      |      |
| 21   | 32.0 %      | Δ                        | 0.582                                 | 0.000                                | 1.624                                | 111.726                             | 174387.028                           | 1774.07     | 4.87  | 99.90                      | 6.65                       |      |      |
| 22   | 34.0 %      | Δ                        | 0.616                                 | 0.000                                | 1.770                                | 125.757                             | 196488.970                           | 1775.24     | 4.78  | 99.91                      | 7.49                       |      |      |
| 23   | 36.0 %      | Δ                        | 0.334                                 | 0.000                                | 1.864                                | 128.829                             | 200928.488                           | 1773.21     | 4.88  | 99.95                      | 7.67                       |      |      |
| 24   | 38.0 %      | Δ                        | 0.280                                 | 0.000                                | 1.809                                | 125.133                             | 195028.836                           | 1772.43     | 4.82  | 99.96                      | 7.45                       |      |      |

ZMT04-4, Analysed in GIGCAS, September 2023, J value = 0.0010683 ± 0.0000011

| Step | Laser power | Step marked <sup>1</sup> | <sup>36</sup> Ar <sub>air</sub><br>fA | <sup>37</sup> Ar <sub>Ca</sub><br>fA | <sup>38</sup> Ar <sub>Cl</sub><br>fA | <sup>39</sup> Ar <sub>K</sub><br>fA | <sup>40</sup> Ar <sup>*2</sup><br>fA | Age<br>(Ma) | ± 2s   | <sup>40</sup> Ar(r)<br>(%) | <sup>39</sup> Ar(k)<br>(%) | K/Ca | ± 2s |
|------|-------------|--------------------------|---------------------------------------|--------------------------------------|--------------------------------------|-------------------------------------|--------------------------------------|-------------|--------|----------------------------|----------------------------|------|------|
| 1    | 3.5 %       |                          | 4.523                                 | 0.000                                | 0.013                                | 1.385                               | 1689.456                             | 1519.98     | 207.05 | 55.83                      | 0.13                       | 0.42 | 2.25 |
| 2    | 4.5 %       | Δ                        | 2.411                                 | 0.000                                | 0.047                                | 4.489                               | 6958.498                             | 1778.70     | 69.55  | 90.71                      | 0.43                       |      |      |
| 3    | 6.0 %       | Δ                        | 5.465                                 | 0.000                                | 0.213                                | 18.326                              | 28575.070                            | 1785.36     | 20.10  | 94.65                      | 1.75                       |      |      |
| 4    | 7.5 %       | Δ                        | 5.170                                 | 0.000                                | 0.548                                | 46.581                              | 71588.598                            | 1768.99     | 11.43  | 97.91                      | 4.46                       |      |      |
| 5    | 9.0 %       | Δ                        | 3.475                                 | 0.000                                | 0.608                                | 49.758                              | 76766.488                            | 1773.35     | 11.86  | 98.68                      | 4.76                       |      |      |
| 6    | 10.5 %      | Δ                        | 3.962                                 | 0.000                                | 0.718                                | 55.793                              | 86270.388                            | 1775.88     | 10.78  | 98.66                      | 5.34                       |      |      |
| 7    | 11.5 %      | Δ                        | 4.139                                 | 0.000                                | 0.733                                | 55.580                              | 86080.094                            | 1777.70     | 10.59  | 98.60                      | 5.32                       |      |      |
| 8    | 12.5 %      | Δ                        | 4.724                                 | 0.000                                | 0.713                                | 58.765                              | 91627.237                            | 1785.32     | 10.67  | 98.50                      | 5.63                       |      |      |
| 9    | 13.5 %      | Δ                        | 2.352                                 | 0.000                                | 0.753                                | 60.598                              | 94452.203                            | 1784.94     | 10.85  | 99.27                      | 5.80                       |      |      |
| 10   | 14.5 %      | Δ                        | 3.415                                 | 0.000                                | 0.643                                | 51.360                              | 80226.138                            | 1787.38     | 11.48  | 98.76                      | 4.92                       |      |      |
| 11   | 16.0 %      | Δ                        | 2.515                                 | 0.000                                | 0.788                                | 63.811                              | 99402.657                            | 1784.27     | 10.42  | 99.26                      | 6.11                       |      |      |
| 12   | 17.5 %      | Δ                        | 3.099                                 | 0.000                                | 0.619                                | 51.094                              | 79703.386                            | 1785.85     | 11.24  | 98.86                      | 4.89                       |      |      |

|    |        |   |       |       |       |        |           |         |       |       |      |
|----|--------|---|-------|-------|-------|--------|-----------|---------|-------|-------|------|
| 13 | 19.0 % | Δ | 5.379 | 0.000 | 0.559 | 47.409 | 73726.838 | 1782.36 | 11.82 | 97.89 | 4.54 |
| 14 | 21.0 % | Δ | 5.545 | 0.000 | 0.817 | 63.434 | 98078.505 | 1775.80 | 10.38 | 98.36 | 6.07 |
| 15 | 23.0 % | Δ | 3.350 | 0.000 | 0.721 | 59.472 | 91947.156 | 1775.73 | 10.49 | 98.93 | 5.69 |
| 16 | 25.0 % | Δ | 3.497 | 0.000 | 0.655 | 54.598 | 83888.776 | 1768.71 | 11.03 | 98.78 | 5.23 |
| 17 | 27.0 % | Δ | 4.205 | 0.000 | 0.714 | 60.813 | 93125.610 | 1764.94 | 10.55 | 98.68 | 5.82 |
| 18 | 29.0 % | Δ | 2.801 | 0.000 | 0.651 | 54.105 | 83093.537 | 1768.19 | 11.41 | 99.01 | 5.18 |
| 19 | 31.0 % | Δ | 1.821 | 0.000 | 0.532 | 43.415 | 66771.389 | 1769.82 | 11.65 | 99.20 | 4.16 |
| 20 | 34.0 % | Δ | 1.743 | 0.000 | 0.738 | 56.924 | 87775.876 | 1772.74 | 10.91 | 99.42 | 5.45 |
| 21 | 37.0 % | Δ | 1.465 | 0.000 | 0.513 | 43.611 | 67206.747 | 1772.07 | 11.74 | 99.36 | 4.18 |
| 22 | 40.0 % | Δ | 1.922 | 0.000 | 0.576 | 43.040 | 66322.529 | 1771.99 | 12.05 | 99.15 | 4.12 |

ZMT04-5-1, Analysed in GIGCAS, September 2023, J value = 0.0011057 ± 0.0000011

| Step | Laser power | Step marked <sup>1</sup> | <sup>36</sup> Ar <sub>air</sub><br>fA | <sup>37</sup> Ar <sub>Ca</sub><br>fA | <sup>38</sup> Ar <sub>Cl</sub><br>fA | <sup>39</sup> Ar <sub>K</sub><br>fA | <sup>40</sup> Ar* <sup>2</sup><br>fA | Age<br>(Ma) | ± 2s  | <sup>40</sup> Ar(r)<br>(%) | <sup>39</sup> Ar(k)<br>(%) | K/Ca  | ± 2s   |
|------|-------------|--------------------------|---------------------------------------|--------------------------------------|--------------------------------------|-------------------------------------|--------------------------------------|-------------|-------|----------------------------|----------------------------|-------|--------|
| 1    | 3.5 %       |                          | 1.958                                 | 48.355                               | 0.258                                | 1.491                               | 556.229                              | 624.38      | 46.91 | 49.01                      | 0.79                       | 0.013 | 0.00   |
| 2    | 4.5 %       |                          | 0.533                                 | 28.039                               | 0.134                                | 4.024                               | 5520.732                             | 1668.98     | 37.40 | 97.22                      | 2.13                       | 0.062 | 0.03   |
| 3    | 6.0 %       | Δ                        | 1.043                                 | 6.273                                | 0.158                                | 5.480                               | 8082.462                             | 1749.08     | 31.49 | 96.33                      | 2.90                       | 0.376 | 0.91   |
| 4    | 7.5 %       | Δ                        | 1.587                                 | 1.428                                | 0.148                                | 9.368                               | 14082.507                            | 1770.48     | 16.31 | 96.78                      | 4.95                       | 2.821 | 26.43  |
| 5    | 9.0 %       | Δ                        | 2.597                                 | 11.121                               | 0.347                                | 16.096                              | 24159.032                            | 1768.74     | 11.81 | 96.92                      | 8.51                       | 0.622 | 0.75   |
| 6    | 10.0 %      | Δ                        | 1.646                                 | 0.000                                | 0.241                                | 12.155                              | 18413.372                            | 1779.23     | 12.67 | 97.43                      | 6.42                       | 4.719 | 57.64  |
| 7    | 11.0 %      | Δ                        | 0.589                                 | 7.141                                | 0.281                                | 13.544                              | 20399.638                            | 1772.70     | 14.69 | 99.15                      | 7.16                       | 0.816 | 1.75   |
| 8    | 12.5 %      | Δ                        | 0.316                                 | 6.465                                | 0.303                                | 15.008                              | 22535.928                            | 1769.23     | 11.57 | 99.59                      | 7.93                       | 0.998 | 2.00   |
| 9    | 14.0 %      | Δ                        | 0.239                                 | 13.573                               | 0.383                                | 15.917                              | 23956.928                            | 1771.91     | 12.56 | 99.70                      | 8.41                       | 0.504 | 0.45   |
| 10   | 15.5 %      | Δ                        | 0.201                                 | 3.897                                | 0.296                                | 16.268                              | 24562.349                            | 1775.47     | 11.46 | 99.76                      | 8.60                       | 1.795 | 6.14   |
| 11   | 17.0 %      | Δ                        | 0.135                                 | 2.463                                | 0.219                                | 10.286                              | 15522.227                            | 1774.82     | 18.01 | 99.74                      | 5.44                       | 1.796 | 9.95   |
| 12   | 19.0 %      | Δ                        | 0.255                                 | 14.825                               | 0.360                                | 16.095                              | 24238.280                            | 1772.53     | 13.97 | 99.69                      | 8.51                       | 0.467 | 0.40   |
| 13   | 21.0 %      | Δ                        | 0.382                                 | 0.684                                | 0.266                                | 11.188                              | 16859.408                            | 1773.26     | 13.53 | 99.33                      | 5.91                       | 7.037 | 159.15 |
| 14   | 24.0 %      | Δ                        | 0.171                                 | 3.236                                | 0.179                                | 10.572                              | 15929.380                            | 1773.11     | 15.21 | 99.68                      | 5.59                       | 1.405 | 5.43   |
| 15   | 27.0 %      | Δ                        | 0.256                                 | 1.982                                | 0.107                                | 7.401                               | 11151.759                            | 1773.12     | 20.58 | 99.32                      | 3.91                       | 1.606 | 10.29  |
| 16   | 30.0 %      | Δ                        | 0.341                                 | 0.000                                | 0.138                                | 8.551                               | 12885.688                            | 1773.26     | 18.72 | 99.22                      | 4.52                       | 6.084 | 108.94 |
| 17   | 35.0 %      | Δ                        | 0.419                                 | 0.000                                | 0.118                                | 6.757                               | 10167.768                            | 1771.61     | 24.28 | 98.80                      | 3.57                       | 6.084 | 108.94 |
| 18   | 40.0 %      | Δ                        | 0.265                                 | 0.000                                | 0.097                                | 6.097                               | 9156.067                             | 1769.36     | 22.19 | 99.15                      | 3.22                       | 6.084 | 108.94 |
| 19   | 45.0 %      | Δ                        | 0.162                                 | 5.598                                | 0.067                                | 2.881                               | 4248.879                             | 1749.05     | 53.92 | 98.89                      | 1.52                       | 0.221 | 0.49   |

ZMT04-5-1, Analysed in GIGCAS, September 2023, J value = 0.0011057 ± 0.0000011

| Step | Laser power | Step marked <sup>1</sup> | <sup>36</sup> Ar <sub>air</sub><br>fA | <sup>37</sup> Ar <sub>Ca</sub><br>fA | <sup>38</sup> Ar <sub>Cl</sub><br>fA | <sup>39</sup> Ar <sub>K</sub><br>fA | <sup>40</sup> Ar* <sup>2</sup><br>fA | Age<br>(Ma) | ± 2s  | <sup>40</sup> Ar(r)<br>(%) | <sup>39</sup> Ar(k)<br>(%) | K/Ca | ± 2s  |
|------|-------------|--------------------------|---------------------------------------|--------------------------------------|--------------------------------------|-------------------------------------|--------------------------------------|-------------|-------|----------------------------|----------------------------|------|-------|
| 1    | 3.5 %       | Δ                        | 2.492                                 | 4.335                                | 0.111                                | 4.154                               | 6175.181                             | 1758.05     | 59.59 | 89.34                      | 0.30                       | 0.41 | 1.29  |
| 2    | 4.5 %       | Δ                        | 3.130                                 | 1.945                                | 0.241                                | 11.383                              | 17285.207                            | 1781.95     | 21.54 | 94.92                      | 0.82                       | 2.52 | 17.59 |
| 3    | 6.0 %       | Δ                        | 6.923                                 | 25.289                               | 0.835                                | 47.361                              | 71694.521                            | 1778.41     | 7.10  | 97.23                      | 3.43                       | 0.81 | 0.47  |
| 4    | 7.0 %       | Δ                        | 3.997                                 | 17.017                               | 0.888                                | 51.135                              | 77089.874                            | 1773.76     | 5.54  | 98.49                      | 3.70                       | 1.29 | 1.04  |
| 5    | 8.0 %       | Δ                        | 2.406                                 | 20.115                               | 0.890                                | 52.387                              | 78764.111                            | 1770.69     | 5.44  | 99.10                      | 3.79                       | 1.12 | 0.76  |
| 6    | 9.0 %       | Δ                        | 7.248                                 | 13.033                               | 0.921                                | 51.836                              | 77996.468                            | 1771.57     | 5.66  | 97.33                      | 3.75                       | 1.71 | 1.91  |
| 7    | 10.0 %      | Δ                        | 6.444                                 | 27.859                               | 0.916                                | 54.254                              | 81429.886                            | 1768.74     | 5.21  | 97.71                      | 3.92                       | 0.84 | 0.44  |
| 8    | 11.0 %      | Δ                        | 4.751                                 | 14.970                               | 0.998                                | 60.987                              | 91976.552                            | 1774.16     | 4.97  | 98.50                      | 4.41                       | 1.75 | 1.65  |
| 9    | 12.0 %      | Δ                        | 4.040                                 | 11.766                               | 1.397                                | 80.362                              | 121153.211                           | 1773.77     | 4.18  | 99.02                      | 5.81                       | 2.94 | 3.65  |
| 10   | 13.0 %      | Δ                        | 1.996                                 | 21.651                               | 1.765                                | 100.883                             | 151897.385                           | 1772.33     | 3.60  | 99.61                      | 7.30                       | 2.00 | 1.36  |
| 11   | 14.0 %      | Δ                        | 1.047                                 | 17.530                               | 1.684                                | 96.716                              | 145773.508                           | 1773.49     | 3.88  | 99.79                      | 7.00                       | 2.37 | 1.86  |

|    |        |   |       |        |       |         |            |         |       |       |      |      |       |
|----|--------|---|-------|--------|-------|---------|------------|---------|-------|-------|------|------|-------|
| 12 | 15.0 % | △ | 1.239 | 25.407 | 2.074 | 120.861 | 182071.083 | 1772.91 | 3.31  | 99.80 | 8.74 | 2.05 | 1.08  |
| 13 | 16.0 % | △ | 1.039 | 22.552 | 1.970 | 115.349 | 173917.117 | 1773.87 | 3.51  | 99.82 | 8.34 | 2.20 | 1.53  |
| 14 | 17.0 % | △ | 0.546 | 10.407 | 1.622 | 94.831  | 142789.283 | 1772.36 | 4.03  | 99.89 | 6.86 | 3.92 | 5.39  |
| 15 | 18.0 % | △ | 0.968 | 28.464 | 2.361 | 137.359 | 206554.141 | 1770.88 | 4.45  | 99.86 | 9.94 | 2.08 | 1.00  |
| 16 | 19.5 % | △ | 0.904 | 22.731 | 2.184 | 128.904 | 193653.837 | 1769.80 | 3.12  | 99.86 | 9.32 | 2.44 | 1.77  |
| 17 | 21.0 % | △ | 0.716 | 5.018  | 1.341 | 78.682  | 118371.161 | 1771.38 | 4.11  | 99.82 | 5.69 | 6.74 | 18.03 |
| 18 | 22.5 % | △ | 0.788 | 14.356 | 0.854 | 51.160  | 77188.084  | 1774.63 | 5.49  | 99.70 | 3.70 | 1.53 | 1.63  |
| 19 | 24.0 % | △ | 0.684 | 19.330 | 0.379 | 23.664  | 35627.721  | 1772.22 | 11.39 | 99.43 | 1.71 | 0.53 | 0.42  |
| 20 | 25.5 % | △ | 0.485 | 0.000  | 0.385 | 20.089  | 30427.319  | 1779.05 | 12.80 | 99.53 | 1.45 | 1.96 | 6.30  |

ZMT04-5-1, Analysed in GIGCAS, September 2023, J value = 0.0011057 ± 0.0000011

| Step | Laser power | Step marked <sup>1</sup> | <sup>36</sup> Ar <sub>air</sub><br>fA | <sup>37</sup> Ar <sub>Ca</sub><br>fA | <sup>38</sup> Ar <sub>Cl</sub><br>fA | <sup>39</sup> Ar <sub>K</sub><br>fA | <sup>40</sup> Ar* <sup>2</sup><br>fA | Age<br>(Ma) | ± 2s   | <sup>40</sup> Ar(r)<br>(%) | <sup>39</sup> Ar(k)<br>(%) | K/Ca | ± 2s  |
|------|-------------|--------------------------|---------------------------------------|--------------------------------------|--------------------------------------|-------------------------------------|--------------------------------------|-------------|--------|----------------------------|----------------------------|------|-------|
| 1    | 3.0 %       |                          | 1.992                                 | 2.589                                | 0.000                                | 0.519                               | 762.366                              | 1745.09     | 474.27 | 56.42                      | 0.04                       | 0.09 | 0.51  |
| 2    | 4.0 %       | △                        | 3.306                                 | 0.000                                | 0.170                                | 9.341                               | 14207.986                            | 1783.80     | 21.67  | 93.57                      | 0.74                       | 0.54 | 0.99  |
| 3    | 5.0 %       | △                        | 4.271                                 | 8.166                                | 0.330                                | 16.778                              | 25284.128                            | 1773.30     | 12.33  | 95.24                      | 1.33                       | 0.88 | 1.75  |
| 4    | 6.0 %       | △                        | 4.018                                 | 6.155                                | 0.690                                | 38.271                              | 57649.221                            | 1772.83     | 6.02   | 97.98                      | 3.03                       | 2.67 | 6.96  |
| 5    | 7.0 %       | △                        | 4.548                                 | 3.179                                | 0.770                                | 44.089                              | 66483.375                            | 1774.01     | 5.33   | 98.02                      | 3.49                       | 5.96 | 28.56 |
| 6    | 8.0 %       | △                        | 5.274                                 | 11.554                               | 0.723                                | 42.252                              | 63664.075                            | 1773.14     | 5.76   | 97.61                      | 3.34                       | 1.57 | 2.44  |
| 7    | 9.0 %       | △                        | 6.058                                 | 17.170                               | 1.093                                | 67.833                              | 102379.022                           | 1775.02     | 4.15   | 98.28                      | 5.37                       | 1.70 | 1.49  |
| 8    | 10.0 %      | △                        | 6.390                                 | 6.468                                | 1.038                                | 63.329                              | 95632.785                            | 1775.64     | 4.13   | 98.06                      | 5.01                       | 4.21 | 9.01  |
| 9    | 11.0 %      | △                        | 4.534                                 | 22.329                               | 1.307                                | 78.920                              | 118869.478                           | 1772.72     | 4.04   | 98.88                      | 6.24                       | 1.52 | 1.03  |
| 10   | 12.0 %      | △                        | 1.964                                 | 9.658                                | 1.262                                | 74.599                              | 112305.739                           | 1772.16     | 3.97   | 99.48                      | 5.90                       | 3.32 | 5.38  |
| 11   | 13.0 %      | △                        | 1.815                                 | 17.989                               | 1.638                                | 101.964                             | 153550.834                           | 1772.51     | 3.20   | 99.65                      | 8.07                       | 2.44 | 2.01  |
| 12   | 14.0 %      | △                        | 1.727                                 | 28.618                               | 1.656                                | 97.157                              | 145931.823                           | 1769.58     | 3.75   | 99.65                      | 7.69                       | 1.46 | 0.74  |
| 13   | 15.0 %      | △                        | 0.911                                 | 18.897                               | 1.542                                | 90.128                              | 135633.697                           | 1771.74     | 3.42   | 99.80                      | 7.13                       | 2.05 | 1.62  |
| 14   | 16.5 %      | △                        | 0.764                                 | 18.954                               | 1.778                                | 101.883                             | 153346.116                           | 1771.90     | 3.26   | 99.85                      | 8.06                       | 2.31 | 1.88  |
| 15   | 18.0 %      | △                        | 0.659                                 | 19.608                               | 1.687                                | 96.657                              | 145264.455                           | 1770.23     | 3.29   | 99.87                      | 7.65                       | 2.12 | 1.69  |
| 16   | 19.5 %      | △                        | 0.679                                 | 13.156                               | 1.681                                | 102.016                             | 153419.048                           | 1770.97     | 3.31   | 99.87                      | 8.07                       | 3.33 | 3.76  |
| 17   | 21.0 %      | △                        | 0.562                                 | 9.047                                | 1.250                                | 76.829                              | 115561.230                           | 1771.17     | 3.77   | 99.86                      | 6.08                       | 3.65 | 6.06  |
| 18   | 22.5 %      | △                        | 0.492                                 | 0.000                                | 1.168                                | 70.339                              | 105803.231                           | 1771.21     | 5.33   | 99.86                      | 5.57                       | 1.41 | 0.99  |
| 19   | 24.0 %      | △                        | 0.451                                 | 9.087                                | 0.882                                | 51.949                              | 78150.329                            | 1771.34     | 5.51   | 99.83                      | 4.11                       | 2.46 | 4.07  |
| 20   | 31.0 %      | △                        | 0.444                                 | 12.628                               | 0.706                                | 39.024                              | 58607.371                            | 1769.43     | 8.11   | 99.78                      | 3.09                       | 1.33 | 1.79  |

ZMT04-5-1, Analysed in GIGCAS, September 2023, J value = 0.0011057 ± 0.0000011

| Step | Laser power | Step marked <sup>1</sup> | <sup>36</sup> Ar <sub>air</sub><br>fA | <sup>37</sup> Ar <sub>Ca</sub><br>fA | <sup>38</sup> Ar <sub>Cl</sub><br>fA | <sup>39</sup> Ar <sub>K</sub><br>fA | <sup>40</sup> Ar* <sup>2</sup><br>fA | Age<br>(Ma) | ± 2s   | <sup>40</sup> Ar(r)<br>(%) | <sup>39</sup> Ar(k)<br>(%) | K/Ca  | ± 2s   |
|------|-------------|--------------------------|---------------------------------------|--------------------------------------|--------------------------------------|-------------------------------------|--------------------------------------|-------------|--------|----------------------------|----------------------------|-------|--------|
| 1    | 3.0 %       | △                        | 0.967                                 | 0.000                                | 0.058                                | 1.269                               | 2118.446                             | 1891.29     | 142.03 | 88.12                      | 0.13                       |       |        |
| 2    | 4.0 %       | △                        | 4.732                                 | 5.727                                | 0.311                                | 16.971                              | 25565.408                            | 1772.91     | 8.60   | 94.81                      | 1.74                       | 1.27  | 2.25   |
| 3    | 5.0 %       | △                        | 2.311                                 | 3.192                                | 0.402                                | 22.465                              | 33847.342                            | 1773.09     | 7.66   | 98.02                      | 2.31                       | 3.03  | 10.25  |
| 4    | 6.0 %       | △                        | 4.019                                 | 4.907                                | 0.616                                | 33.917                              | 51018.654                            | 1771.22     | 4.67   | 97.72                      | 3.48                       | 2.97  | 5.86   |
| 5    | 7.0 %       | △                        | 2.492                                 | 0.575                                | 0.747                                | 42.746                              | 64417.968                            | 1773.30     | 4.19   | 98.87                      | 4.39                       | 31.97 | 598.36 |
| 6    | 8.0 %       | △                        | 6.180                                 | 7.842                                | 1.016                                | 58.561                              | 88144.895                            | 1771.96     | 2.53   | 97.97                      | 6.02                       | 3.21  | 3.22   |
| 7    | 9.0 %       | △                        | 4.943                                 | 4.377                                | 0.976                                | 60.526                              | 91196.429                            | 1773.12     | 2.89   | 98.42                      | 6.22                       | 5.95  | 15.00  |
| 8    | 10.0 %      | △                        | 4.690                                 | 13.432                               | 1.432                                | 86.136                              | 129475.023                           | 1770.42     | 2.02   | 98.94                      | 8.85                       | 2.76  | 2.54   |
| 9    | 11.0 %      | △                        | 1.751                                 | 18.757                               | 1.645                                | 97.033                              | 145865.346                           | 1770.51     | 2.03   | 99.65                      | 9.97                       | 2.22  | 1.17   |
| 10   | 12.0 %      | △                        | 0.745                                 | 21.129                               | 1.350                                | 78.819                              | 118664.971                           | 1772.22     | 2.54   | 99.81                      | 8.10                       | 1.60  | 0.68   |
| 11   | 13.0 %      | △                        | 0.713                                 | 19.649                               | 1.711                                | 101.426                             | 152408.572                           | 1770.06     | 1.84   | 99.86                      | 10.42                      | 2.22  | 0.98   |

|    |        |   |       |        |       |        |            |         |       |       |       |      |       |
|----|--------|---|-------|--------|-------|--------|------------|---------|-------|-------|-------|------|-------|
| 12 | 14.0 % | △ | 0.529 | 19.242 | 1.707 | 99.412 | 149567.585 | 1771.46 | 1.80  | 99.89 | 10.21 | 2.22 | 1.24  |
| 13 | 15.0 % | △ | 0.403 | 29.280 | 1.337 | 81.749 | 123121.861 | 1772.64 | 2.26  | 99.90 | 8.40  | 1.20 | 0.45  |
| 14 | 16.5 % | △ | 0.506 | 17.667 | 1.250 | 75.950 | 114259.407 | 1771.37 | 2.50  | 99.87 | 7.80  | 1.85 | 1.05  |
| 15 | 18.0 % | △ | 0.356 | 13.198 | 0.834 | 49.450 | 74319.318  | 1770.26 | 3.80  | 99.86 | 5.08  | 1.61 | 0.97  |
| 16 | 19.5 % | △ | 0.294 | 11.522 | 0.468 | 29.960 | 45062.199  | 1771.13 | 3.99  | 99.81 | 3.08  | 1.12 | 0.82  |
| 17 | 21.0 % | △ | 0.398 | 0.000  | 0.178 | 14.666 | 22066.817  | 1771.50 | 10.30 | 99.47 | 1.51  | 3.04 | 10.97 |
| 18 | 22.5 % | △ | 0.274 | 17.953 | 0.152 | 9.640  | 14490.004  | 1770.39 | 15.67 | 99.44 | 0.99  | 0.23 | 0.17  |
| 19 | 24.0 % | △ | 0.221 | 8.316  | 0.116 | 8.835  | 13283.178  | 1770.67 | 14.58 | 99.51 | 0.91  | 0.46 | 0.51  |
| 20 | 26.0 % | △ | 0.228 | 7.167  | 0.073 | 3.804  | 5631.775   | 1753.20 | 32.48 | 98.82 | 0.39  | 0.23 | 0.27  |

ZMT04-5-1, Analysed in GIGCAS, September 2023, J value = 0.0011057 ± 0.0000011

| Step | Laser power | Step marked <sup>1</sup> | <sup>36</sup> Ar <sub>air</sub><br>fA | <sup>37</sup> Ar <sub>Ca</sub><br>fA | <sup>38</sup> Ar <sub>Cl</sub><br>fA | <sup>39</sup> Ar <sub>K</sub><br>fA | <sup>40</sup> Ar <sup>*2</sup><br>fA | Age<br>(Ma) | ± 2s   | <sup>40</sup> Ar(r)<br>(%) | <sup>39</sup> Ar(k)<br>(%) | K/Ca  | ± 2s   |
|------|-------------|--------------------------|---------------------------------------|--------------------------------------|--------------------------------------|-------------------------------------|--------------------------------------|-------------|--------|----------------------------|----------------------------|-------|--------|
| 1    | 3.0 %       | △                        | 1.134                                 | 2.809                                | 0.000                                | 0.722                               | 1019.283                             | 1700.47     | 240.79 | 75.26                      | 0.04                       | 0.11  | 0.71   |
| 2    | 4.0 %       | △                        | 2.781                                 | 0.000                                | 0.071                                | 4.993                               | 7547.701                             | 1776.84     | 32.07  | 90.18                      | 0.31                       |       |        |
| 3    | 5.0 %       | △                        | 2.556                                 | 7.808                                | 0.537                                | 31.540                              | 47628.253                            | 1775.63     | 7.32   | 98.44                      | 1.93                       | 1.74  | 3.59   |
| 4    | 6.0 %       | △                        | 2.787                                 | 17.083                               | 0.601                                | 37.613                              | 56498.328                            | 1769.62     | 5.31   | 98.56                      | 2.31                       | 0.95  | 0.94   |
| 5    | 7.0 %       | △                        | 1.740                                 | 0.000                                | 0.543                                | 28.324                              | 42807.560                            | 1776.59     | 6.03   | 98.81                      | 1.74                       | 1.13  | 1.22   |
| 6    | 8.0 %       | △                        | 4.743                                 | 4.008                                | 0.435                                | 24.574                              | 37114.576                            | 1775.80     | 7.24   | 96.36                      | 1.51                       | 2.64  | 9.98   |
| 7    | 9.0 %       | △                        | 2.222                                 | 0.000                                | 0.586                                | 33.473                              | 50396.799                            | 1772.26     | 6.03   | 98.71                      | 2.05                       | 15.56 | 305.72 |
| 8    | 10.0 %      | △                        | 2.930                                 | 6.089                                | 0.755                                | 45.419                              | 68474.258                            | 1773.77     | 10.42  | 98.75                      | 2.78                       | 3.21  | 8.83   |
| 9    | 11.0 %      | △                        | 1.894                                 | 14.492                               | 1.030                                | 60.495                              | 91119.913                            | 1772.75     | 4.26   | 99.39                      | 3.71                       | 1.79  | 2.04   |
| 10   | 12.0 %      | △                        | 1.899                                 | 10.601                               | 1.249                                | 77.190                              | 116389.424                           | 1773.95     | 4.31   | 99.52                      | 4.73                       | 3.13  | 4.70   |
| 11   | 13.0 %      | △                        | 3.413                                 | 16.423                               | 1.584                                | 91.964                              | 138347.301                           | 1771.34     | 2.92   | 99.28                      | 5.64                       | 2.41  | 2.33   |
| 12   | 14.0 %      | △                        | 2.182                                 | 25.647                               | 1.648                                | 97.714                              | 147290.793                           | 1773.59     | 3.37   | 99.56                      | 5.99                       | 1.64  | 1.06   |
| 13   | 15.0 %      | △                        | 2.147                                 | 17.687                               | 1.444                                | 88.833                              | 133385.832                           | 1769.21     | 3.39   | 99.53                      | 5.45                       | 2.16  | 2.16   |
| 14   | 16.5 %      | △                        | 1.127                                 | 27.093                               | 1.839                                | 108.568                             | 163332.462                           | 1771.38     | 2.79   | 99.80                      | 6.66                       | 1.72  | 1.06   |
| 15   | 18.0 %      | △                        | 0.696                                 | 24.547                               | 1.876                                | 110.584                             | 166301.568                           | 1770.95     | 2.93   | 99.88                      | 6.78                       | 1.94  | 1.25   |
| 16   | 19.5 %      | △                        | 0.471                                 | 3.753                                | 1.545                                | 91.984                              | 138404.836                           | 1771.57     | 2.81   | 99.90                      | 5.64                       | 10.54 | 49.09  |
| 17   | 21.0 %      | △                        | 0.489                                 | 28.857                               | 2.090                                | 127.417                             | 191494.427                           | 1770.24     | 3.10   | 99.92                      | 7.81                       | 1.90  | 1.07   |
| 18   | 22.5 %      | △                        | 0.352                                 | 30.354                               | 2.625                                | 152.426                             | 229133.438                           | 1770.50     | 2.69   | 99.95                      | 9.34                       | 2.16  | 1.29   |
| 19   | 24.0 %      | △                        | 0.281                                 | 16.541                               | 2.046                                | 122.633                             | 184192.916                           | 1769.55     | 2.74   | 99.95                      | 7.52                       | 3.19  | 2.97   |
| 20   | 25.5 %      | △                        | 0.546                                 | 13.757                               | 1.683                                | 101.687                             | 152818.521                           | 1770.19     | 3.02   | 99.89                      | 6.23                       | 3.18  | 4.12   |
| 21   | 27.0 %      | △                        | 0.601                                 | 10.766                               | 1.095                                | 65.448                              | 98443.996                            | 1771.19     | 3.79   | 99.82                      | 4.01                       | 2.61  | 4.15   |
| 22   | 28.5 %      | △                        | 0.459                                 | 0.000                                | 0.646                                | 39.536                              | 59530.702                            | 1772.37     | 4.99   | 99.77                      | 2.42                       | 2.73  | 5.99   |
| 23   | 30.0 %      | △                        | 0.792                                 | 0.613                                | 0.540                                | 29.256                              | 44047.164                            | 1772.24     | 8.00   | 99.47                      | 1.79                       | 20.53 | 549.43 |
| 24   | 33.0 %      | △                        | 0.548                                 | 5.286                                | 0.287                                | 16.016                              | 24050.055                            | 1769.30     | 14.25  | 99.33                      | 0.98                       | 1.30  | 3.83   |
| 25   | 40.0 %      | △                        | 0.742                                 | 14.131                               | 0.739                                | 42.734                              | 64133.037                            | 1768.61     | 5.30   | 99.66                      | 2.62                       | 1.30  | 1.49   |

ZMT04-5-1, Analysed in GIGCAS, September 2023, J value = 0.0011057 ± 0.0000011

| Step | Laser power | Step marked <sup>1</sup> | <sup>36</sup> Ar <sub>air</sub><br>fA | <sup>37</sup> Ar <sub>Ca</sub><br>fA | <sup>38</sup> Ar <sub>Cl</sub><br>fA | <sup>39</sup> Ar <sub>K</sub><br>fA | <sup>40</sup> Ar <sup>*2</sup><br>fA | Age<br>(Ma) | ± 2s   | <sup>40</sup> Ar(r)<br>(%) | <sup>39</sup> Ar(k)<br>(%) | K/Ca | ± 2s  |
|------|-------------|--------------------------|---------------------------------------|--------------------------------------|--------------------------------------|-------------------------------------|--------------------------------------|-------------|--------|----------------------------|----------------------------|------|-------|
| 1    | 3.0 %       | △                        | 2.088                                 | 0.000                                | 0.018                                | 0.883                               | 1325.528                             | 1769.54     | 201.01 | 68.23                      | 0.05                       | 0.01 | 0.01  |
| 2    | 4.0 %       | △                        | 3.352                                 | 0.000                                | 0.101                                | 3.521                               | 5028.568                             | 1713.16     | 43.94  | 83.54                      | 0.20                       | 0.05 | 0.03  |
| 3    | 5.0 %       | △                        | 5.386                                 | 6.286                                | 0.275                                | 14.755                              | 22201.117                            | 1771.55     | 11.99  | 93.31                      | 0.84                       | 1.01 | 2.39  |
| 4    | 6.0 %       | △                        | 3.437                                 | 2.951                                | 0.739                                | 41.689                              | 62579.779                            | 1768.91     | 4.81   | 98.40                      | 2.36                       | 6.07 | 32.15 |
| 5    | 7.0 %       | △                        | 4.938                                 | 9.778                                | 0.998                                | 58.689                              | 88222.911                            | 1770.49     | 3.61   | 98.37                      | 3.32                       | 2.58 | 4.03  |
| 6    | 8.0 %       | △                        | 4.823                                 | 13.230                               | 1.188                                | 68.278                              | 102182.020                           | 1765.47     | 5.67   | 98.62                      | 3.86                       | 2.22 | 2.50  |

|    |        |   |       |        |       |        |            |         |      |       |      |       |        |
|----|--------|---|-------|--------|-------|--------|------------|---------|------|-------|------|-------|--------|
| 7  | 9.0 %  | △ | 3.415 | 0.790  | 1.307 | 77.335 | 116340.595 | 1771.35 | 4.16 | 99.14 | 4.38 | 42.09 | 711.32 |
| 8  | 10.0 % | △ | 5.459 | 6.897  | 1.332 | 74.042 | 111509.529 | 1772.59 | 3.18 | 98.57 | 4.19 | 4.62  | 10.21  |
| 9  | 11.0 % | △ | 2.728 | 3.146  | 1.247 | 74.259 | 111916.346 | 1773.40 | 3.12 | 99.28 | 4.20 | 10.15 | 45.53  |
| 10 | 12.0 % | △ | 3.167 | 9.463  | 1.293 | 78.258 | 117869.138 | 1772.69 | 3.35 | 99.21 | 4.43 | 3.56  | 5.34   |
| 11 | 13.0 % | △ | 3.441 | 15.238 | 1.137 | 67.209 | 101050.208 | 1770.71 | 3.83 | 99.00 | 3.80 | 1.90  | 1.99   |
| 12 | 14.0 % | △ | 2.582 | 15.198 | 1.079 | 63.317 | 95198.613  | 1770.71 | 3.27 | 99.20 | 3.58 | 1.79  | 1.51   |
| 13 | 15.0 % | △ | 1.646 | 10.597 | 1.050 | 64.348 | 96968.996  | 1773.28 | 3.88 | 99.50 | 3.64 | 2.61  | 3.84   |
| 14 | 16.0 % | △ | 1.223 | 14.478 | 0.927 | 56.053 | 84570.463  | 1774.63 | 4.10 | 99.57 | 3.17 | 1.66  | 1.66   |
| 15 | 17.0 % | △ | 1.234 | 18.752 | 0.955 | 61.737 | 92930.023  | 1772.01 | 4.07 | 99.61 | 3.49 | 1.42  | 1.12   |
| 16 | 18.0 % | △ | 1.067 | 20.402 | 1.068 | 66.109 | 99538.107  | 1772.32 | 4.52 | 99.68 | 3.74 | 1.39  | 1.00   |
| 17 | 19.0 % | △ | 0.649 | 5.677  | 0.956 | 59.521 | 89375.573  | 1769.25 | 3.42 | 99.78 | 3.37 | 4.51  | 12.79  |
| 18 | 20.0 % | △ | 0.507 | 1.706  | 0.896 | 54.775 | 82305.615  | 1770.03 | 6.67 | 99.82 | 3.10 | 13.81 | 116.92 |
| 19 | 21.0 % | △ | 0.361 | 11.359 | 0.841 | 52.139 | 78523.558  | 1772.60 | 4.37 | 99.86 | 2.95 | 1.97  | 2.53   |
| 20 | 22.0 % | △ | 0.308 | 7.957  | 1.019 | 59.246 | 89042.005  | 1770.26 | 4.77 | 99.90 | 3.35 | 3.20  | 5.96   |
| 21 | 23.0 % | △ | 0.396 | 7.546  | 1.115 | 65.434 | 98409.364  | 1771.03 | 4.30 | 99.88 | 3.70 | 3.73  | 7.63   |
| 22 | 24.0 % | △ | 0.327 | 0.000  | 0.976 | 58.398 | 87816.081  | 1770.88 | 4.39 | 99.89 | 3.31 | 0.79  | 0.47   |
| 23 | 25.0 % | △ | 0.282 | 7.650  | 1.089 | 63.723 | 95697.768  | 1769.40 | 5.06 | 99.91 | 3.61 | 3.58  | 8.11   |
| 24 | 26.0 % | △ | 0.395 | 3.745  | 1.283 | 74.114 | 111541.711 | 1771.82 | 3.69 | 99.89 | 4.19 | 8.51  | 35.08  |
| 25 | 27.0 % | △ | 0.314 | 0.000  | 0.981 | 57.319 | 86284.968  | 1772.09 | 3.45 | 99.89 | 3.24 | 0.85  | 0.53   |
| 26 | 28.0 % | △ | 0.329 | 2.245  | 1.296 | 73.659 | 110786.736 | 1771.11 | 4.18 | 99.91 | 4.17 | 14.11 | 95.88  |
| 27 | 29.0 % | △ | 0.352 | 18.583 | 1.356 | 78.259 | 117567.202 | 1769.77 | 3.97 | 99.91 | 4.43 | 1.81  | 1.38   |
| 28 | 30.0 % | △ | 0.187 | 14.185 | 0.916 | 52.651 | 79225.309  | 1771.61 | 5.87 | 99.93 | 2.98 | 1.60  | 1.46   |
| 29 | 31.0 % | △ | 0.383 | 2.602  | 1.275 | 74.759 | 112459.256 | 1771.28 | 3.48 | 99.90 | 4.23 | 12.36 | 65.61  |
| 30 | 32.0 % | △ | 0.428 | 10.616 | 1.203 | 72.384 | 109118.954 | 1773.70 | 3.69 | 99.88 | 4.10 | 2.93  | 4.11   |

Note:

Step marked <sup>1</sup>: The steps marked with "△" were included in the calculation for the plateau ages.

<sup>40</sup>Ar\*<sup>2</sup>: <sup>40</sup>Ar\* was obtained with the modern atmospheric <sup>40</sup>Ar/<sup>36</sup>Ar value of 298.56 ( $^{40}\text{Ar}^* = ^{40}\text{Ar}_m - 298.56 \times ^{36}\text{Ar}_m$ )

Result in red color: The regression result was <0, and force negative intensities ( represented in red) to be zero in calculation by ArArCALC 2.5.2.
